# Supplementary material for: Interspecific variation and phylogenetic relationship between mangrove and non-mangrove species of a same family (Meliaceae)—insights from comparative analysis of complete chloroplast genome
Source: PeerJ. 2023 Jun 26;11:e15527. doi: 10.7717/peerj.15527 (PMC10309054; doi:10.7717/peerj.15527)
Supplement: Supplemental Information 1 [file peerj-11-15527-s001.xlsx]

## Sheet: Sheet1
Table S1: Species Information
Species	Accession	Reference	Locality	Longitude, Latitude	Voucher information
Xylocarpus rumphii	MH330687	In this study	Sentosa Island, Singapore	103.84,1.25	Yang 18221 (X. Yang, 2014/02)
Xylocarpus moluccensis	MH330688	In this study	Sungei Buloh Wetland Reserve, Singapore	103.73,1.45	Yang 18113 (X. Yang, 2014/02)
Xylocarpus granatum	MH348155	In this study	Sungei Buloh Wetland Reserve, Singapore	103.72,1.44	Yang 18107 (X. Yang, 2014/02)
Swietenia macrophylla	MH348156	In this study	cultivated in Sun Yat-sen University, Guangzhou, China	113.30,23.10	Huang 19280 ( Y. Huang, 2017/03)
Carapa guianensis	MH396436	In this study	cultivated in Singapore Botanical Garden, Singapore	103.81,1.31	Yang 18332 (X. Yang, 2014/03)
Ailanthus altissima	MG799542	Saina JK, Li ZZ, Gichira AW, Liao YY. The Complete Chloroplast Genome Sequence of Tree of Heaven (Ailanthus altissima (Mill.) (Sapindales: Simaroubaceae), an Important Pantropical Tree. Int J Mol Sci. 2018 Mar 21;19(4):929. doi: 10.3390/ijms19040929. PMID: 29561773; PMCID: PMC5979363.
Azadirachta indica	KF986530	He ST, Wu JC, Zheng YX, Zhang YP, Li SH, Peng XM. The complete chloroplast genome of the genus Azadirachta. Mitochondrial DNA B Resour. 2022 Jul 14;7(7):1267-1269. doi: 10.1080/23802359.2022.2095230. PMID: 35859717; PMCID: PMC9291716.
Boswellia sacra	NC_029420	No ref.
Cedrela odorata	NC_037251	Mader M, Pakull B, Blanc-Jolivet C, Paulini-Drewes M, Bouda ZH, Degen B, Small I, Kersten B. Complete Chloroplast Genome Sequences of Four Meliaceae Species and Comparative Analyses. Int J Mol Sci. 2018 Mar 1;19(3):701. doi: 10.3390/ijms19030701. PMID: 29494509; PMCID: PMC5877562.
Citrus sinensis	DQ864733	Bausher MG, Singh ND, Lee SB, Jansen RK, Daniell H. The complete chloroplast genome sequence of Citrus sinensis (L.) Osbeck var 'Ridge Pineapple': organization and phylogenetic relationships to other angiosperms. BMC Plant Biol. 2006 Sep 30;6:21. doi: 10.1186/1471-2229-6-21. PMID: 17010212; PMCID: PMC1599732.
Clausena excavata	NC_032685	Shivakumar VS, Appelhans MS, Johnson G, Carlsen M, Zimmer EA. Analysis of whole chloroplast genomes from the genera of the Clauseneae, the curry tribe (Rutaceae, Citrus family). Mol Phylogenet Evol. 2017 Dec;117:135-140. doi: 10.1016/j.ympev.2016.12.015. Epub 2016 Dec 11. PMID: 27965082.
Commiphora wightii	NC_036978	No ref.
Dodonaea viscosa	NC_036099	Saina JK, Gichira AW, Li ZZ, Hu GW, Wang QF, Liao K. The complete chloroplast genome sequence of Dodonaea viscosa: comparative and phylogenetic analyses. Genetica. 2018 Feb;146(1):101-113. doi: 10.1007/s10709-017-0003-x. Epub 2017 Nov 23. PMID: 29170851.
Entandrophragma cylindricum	NC_037250	Mader M, Pakull B, Blanc-Jolivet C, Paulini-Drewes M, Bouda ZH, Degen B, Small I, Kersten B. Complete Chloroplast Genome Sequences of Four Meliaceae Species and Comparative Analyses. Int J Mol Sci. 2018 Mar 1;19(3):701. doi: 10.3390/ijms19030701. PMID: 29494509; PMCID: PMC5877562.
Eurycorymbus cavaleriei	NC_037443	Chen Z, Qiao O, Liu B, Sun H. Complete chloroplast genome of Eurycorymbus Cavaleriei (Sapindaceae), a tertiary relic rare tree. Mitochondrial DNA B Resour. 2019 Sep 25;4(2):3250-3251. doi: 10.1080/23802359.2019.1670113. PMID: 33365941; PMCID: PMC7707303.
Khaya senegalensis	NC_037362	Mader M, Pakull B, Blanc-Jolivet C, Paulini-Drewes M, Bouda ZH, Degen B, Small I, Kersten B. Complete Chloroplast Genome Sequences of Four Meliaceae Species and Comparative Analyses. Int J Mol Sci. 2018 Mar 1;19(3):701. doi: 10.3390/ijms19030701. PMID: 29494509; PMCID: PMC5877562.
Koelreusteria paniculata	NC_037176	No ref.
Mangifera indica	NC_035239	No ref.
Micromelum minutum	NC_032689	Shivakumar VS, Appelhans MS, Johnson G, Carlsen M, Zimmer EA. Analysis of whole chloroplast genomes from the genera of the Clauseneae, the curry tribe (Rutaceae, Citrus family). Mol Phylogenet Evol. 2017 Dec;117:135-140. doi: 10.1016/j.ympev.2016.12.015. Epub 2016 Dec 11. PMID: 27965082.
Phellodendron amurense	NC_035551	No ref.
Sapindus mukorossi	NC_025554	Yang B, Li M, Ma J, Fu Z, Xu X, Chen Q, Zhu W, Tian J. The complete chloroplast genome sequence of Sapindus mukorossi. Mitochondrial DNA A DNA Mapp Seq Anal. 2016 May;27(3):1825-6. doi: 10.3109/19401736.2014.971243. Epub 2014 Oct 15. PMID: 25317637.
Bixa Orellana [Outgroup]	MH751592	Dai S, Li X, Ni J, Ruan L, Zhou R, Ng WL. The complete chloroplast genome of the lipstick tree, Bixa Orellana (Bixaceae). Mitochondrial DNA B Resour. 2018 Nov 21;4(1):17-18. doi: 10.1080/23802359.2018.1535847. PMID: 33365401; PMCID: PMC7510647.
Capparis spinosa [Outgroup]	MT041701	Alzahrani D, Albokhari E, Yaradua S, Abba A. The complete chloroplast genomes of two species from Capparaceae. Mitochondrial DNA B Resour. 2021 Feb 20;6(2):601-603. doi: 10.1080/23802359.2020.1852902. PMID: 33681464; PMCID: PMC7901692.
