# Supplementary material for: Interspecific variation and phylogenetic relationship between mangrove and non-mangrove species of a same family (Meliaceae)—insights from comparative analysis of complete chloroplast genome
Source: PeerJ. 2023 Jun 26;11:e15527. doi: 10.7717/peerj.15527 (PMC10309054; doi:10.7717/peerj.15527)
Supplement: Supplemental Information 2 [file peerj-11-15527-s002.xlsx]

## Sheet: Sheet1
Table S2: List of PCR primer sets for assembly validation
No.	Regions	Sequence (5'-3')	Production size (bp)
1	LSC-IRA	F: TCTGCCTGTTCAGTTAAT	864
		R: AAGACCCACTTGTCATAT
2	IRA-SSC	F: GATCCTTCTCCTTCCCTT	816
		R: GTTATTTGCTATGCTTGTAT
3	SSC-IRB	F: TCCGCAGTTTTCTTCTTT	534
		R: ATTTGGCCCAATTATCGA
4	IRB-LSC	F: ATTCGTGGACGTTCTTAC	716
		R: ATGCTCATAACTTCCCTC
