# Supplementary material for: Interspecific variation and phylogenetic relationship between mangrove and non-mangrove species of a same family (Meliaceae)—insights from comparative analysis of complete chloroplast genome
Source: PeerJ. 2023 Jun 26;11:e15527. doi: 10.7717/peerj.15527 (PMC10309054; doi:10.7717/peerj.15527)
Supplement: Supplemental Information 3 [file peerj-11-15527-s003.xlsx]

## Sheet: Sheet1
Table S3 The basic chloroplast genome characteristics of five Meliaceae species
	Xylocarpus granatum	Xylocarpus moluccensis	Xylocarpus rumphii	Swietenia macrophylla	Carapa guianensis
Total cpDNA Length (bp)	159410	159319	159282	159276	159467
LSC (bp)	87345	87321	87381	86958	87041
SSC (bp)	18041	17998	17967	18214	18276
IR (bp)	27012	27000	26967	27052	27075
GC content (%)	37.86	37.87	37.87	37.95	37.91
Gene number	130	130	130	130	130
Gene in LSC	81	81	81	81	81
Gene in SSC	13	13	13	13	13
Gens in IR	18	18	18	18	18
Protein-coding genes	85	85	85	85	85
rRNA genes	8	8	8	8	8
tRNA genes	37	37	37	37	37
