# Supplementary material for: Interspecific variation and phylogenetic relationship between mangrove and non-mangrove species of a same family (Meliaceae)—insights from comparative analysis of complete chloroplast genome
Source: PeerJ. 2023 Jun 26;11:e15527. doi: 10.7717/peerj.15527 (PMC10309054; doi:10.7717/peerj.15527)
Supplement: Supplemental Information 4 [file peerj-11-15527-s004.xlsx]

## Sheet: Sheet1
Table S4 SNP and INDEL among three Xylocarpus species and two accessions of Carapa guianensis
Section 1 SNPs and INDEL detected between two Carapa guianensis accessions
Reference	Qurey	POS	TYPE	REF	ALT	EVIDENCE	FTYPE	STRAND	NT_POS	AA_POS	EFFECT	LOCUS_TAG	GENE	PRODUCT
Carapa guianensis [NC_037442]	Carapa guianensis [MH396436.1, In this study]	7543	del	TA	T	T:19 TA:0
		9176	snp	T	C	C:20 T:0
		31632	del	TAATCTCATC	T	T:17 TAATCTCATC:0	CDS	-			intragenic_variant n.31633_31641delAATCTCATC	DDH87_pgp072	psbM	photosystem II protein M
		45744	del	CT	C	C:19 CT:0
		57295	ins	G	GT	GT:18 G:0	CDS	-	57/1497	19/498	frameshift_variant c.57dupA p.Leu20fs	DDH87_pgp059	atpB	ATP synthase CF1 beta subunit
		68854	del	TA	T	T:19 TA:0
		74060	ins	G	GA	GA:17 G:0
		78236	del	AT	A	A:20 AT:0
		84025	snp	A	C	C:20 A:0
		114944	snp	C	G	G:20 C:0	CDS	-	1401/2229	467/742	synonymous_variant c.1401G>C p.Gly467Gly	DDH87_pgp018	ndhF	NdhF
		120001	del	AT	A	A:18 AT:0
		127794	del	AC	A	A:18 AC:0
Section 2 SNPs and INDEL detected between Xylocarpus rumphii and Xylocarpus moluccensis
Reference	Qurey	POS	TYPE	REF	ALT	EVIDENCE	FTYPE	STRAND	NT_POS	AA_POS	EFFECT	LOCUS_TAG	GENE	PRODUCT
Xylocarpus rumphii [MH330687]	Xylocarpus moluccensis [MH330688.1]	202	snp	C	A	A:18 C:0
		241	ins	T	TTCATA	TTCATA:18 T:0
		343	snp	G	T	T:20 G:0
		382	snp	G	A	A:20 G:0
		432	del	GA	G	G:19 GA:0
		469	snp	A	C	C:20 A:0
		2191	snp	C	A	A:20 C:0
		2929	snp	C	A	A:20 C:0	CDS	-	781/1518	261/505	missense_variant c.781G>T p.Asp261Tyr		matK	maturase K
		3302	snp	T	G	G:20 T:0	CDS	-	408/1518	136/505	missense_variant c.408A>C p.Leu136Phe		matK	maturase K
		3797	del	TA	T	T:19 TA:0
		4002	snp	C	A	A:20 C:0
		4053	snp	T	G	G:20 T:0
		4848	ins	A	AATATCCTC	AATATCCTC:17 A:0
		4872	complex	TC	ATA	ATA:16 TC:0
		5164	snp	C	A	A:20 C:0
		5254	ins	A	AG	AG:18 A:0
		5309	del	CT	C	C:18 CT:0
		5567	ins	A	AT	AT:20 A:0
		6704	snp	T	G	G:20 T:0
		7298	snp	C	A	A:20 C:0
		7449	del	ATT	A	A:18 ATT:0
		7520	del	CTTTTTGA	C	C:18 CTTTTTGA:0
		8105	snp	C	A	A:20 C:0
		9209	ins	G	GA	GA:18 G:0
		9286	snp	A	C	C:20 A:0
		9366	ins	A	ATTTAG	ATTTAG:18 A:0
		9563	ins	G	GAA	GAA:17 G:0
		9889	snp	C	A	A:20 C:0
		10226	ins	A	AT	AT:18 A:0
		10346	snp	G	A	A:20 G:0
		10830	snp	T	A	A:20 T:0
		10906	snp	A	G	G:20 A:0
		13722	snp	T	A	A:20 T:0
		14017	ins	C	CT	CT:20 C:0
		15411	snp	T	C	C:20 T:0
		15423	snp	A	C	C:20 A:0
		18708	snp	C	G	G:20 C:0	CDS	-	3256/4194	1086/1397	missense_variant c.3256G>C p.Val1086Leu		rpoC2	RNA polymerase beta'' subunit
		20217	snp	G	A	A:20 G:0	CDS	-	1747/4194	583/1397	missense_variant c.1747C>T p.Leu583Phe		rpoC2	RNA polymerase beta'' subunit
		20602	snp	G	C	C:20 G:0	CDS	-	1362/4194	454/1397	synonymous_variant c.1362C>G p.Val454Val		rpoC2	RNA polymerase beta'' subunit
		21184	snp	C	G	G:20 C:0	CDS	-	780/4194	260/1397	missense_variant c.780G>C p.Met260Ile		rpoC2	RNA polymerase beta'' subunit
		25269	complex	TT	GG	GG:20 TT:0	CDS	-	2929/3213	976/1070	synonymous_variant c.2928_2929delAAinsCC p.978		rpoB	RNA polymerase beta subunit
		26107	snp	G	C	C:20 G:0	CDS	-	2091/3213	697/1070	synonymous_variant c.2091C>G p.Val697Val		rpoB	RNA polymerase beta subunit
		26640	snp	T	G	G:20 T:0	CDS	-	1558/3213	520/1070	missense_variant c.1558A>C p.Thr520Pro		rpoB	RNA polymerase beta subunit
		28268	snp	T	G	G:20 T:0
		29857	snp	C	A	A:20 C:0
		29917	snp	G	C	C:20 G:0
		30217	ins	T	TA	TA:20 T:0
		30295	snp	G	T	T:20 G:0
		30798	del	ATT	A	A:18 ATT:0
		30891	snp	C	A	A:20 C:0
		31431	snp	T	G	G:18 T:0
		31609	ins	T	TAATACTTTATTTATAATACTTTA	TAATACTTTATTTATAATACTTTA:13 T:0
		32905	ins	C	CGGACAAA	CGGACAAA:18 C:0
		32921	del	CT	C	C:18 CT:0
		34086	snp	C	G	G:20 C:0
		34093	snp	C	G	G:20 C:0
		37475	snp	C	T	T:20 C:0
		37895	snp	C	A	A:20 C:0
		38223	ins	T	TA	TA:19 T:0
		38432	snp	C	A	A:20 C:0
		38884	snp	T	C	C:19 T:0
		38891	del	CAAAAAAA	C	C:17 CAAAAAAA:0
		39246	snp	C	T	T:20 C:0	CDS	-	207/303	69/100	synonymous_variant c.207G>A p.Pro69Pro		rps14	ribosomal protein S14
		42015	snp	T	C	C:20 T:0	CDS	-	2064/2253	688/750	synonymous_variant c.2064A>G p.Gly688Gly		psaA	photosystem I P700 apoprotein A1
		44546	snp	G	C	C:18 G:0
		45009	del	GT	G	G:19 GT:0
		45219	snp	T	G	G:20 T:0
		45614	snp	N	A	A:20 N:0
		45627	snp	N	A	A:20 N:0
		45639	snp	N	A	A:20 N:0
		45651	complex	CCCCCCCCCCCCCCCTTTTTTTTTTTCTTTTACT	TCCCCCCCCCCCCCCCTTTTTTTTTCTTTTAC	TCCCCCCCCCCCCCCCTTTTTTTTTCTTTTAC:15 CCCCCCCCCCCCCCCTTTTTTTTTTTCTTTTACT:0
		46064	snp	G	T	T:20 G:0
		46146	snp	C	T	T:20 C:0
		46418	complex	GC	TG	TG:19 GC:0
		46655	snp	G	A	A:20 G:0
		47382	del	AAAAAAT	A	A:18 AAAAAAT:0
		47494	snp	C	G	G:20 C:0
		47932	snp	C	A	A:20 C:0
		48390	snp	T	C	C:20 T:0	CDS	-	291/606	97/201	synonymous_variant c.291A>G p.Arg97Arg		rps4	ribosomal protein S4
		48996	ins	C	CT	CT:18 C:0
		49174	snp	A	G	G:20 A:0
		49233	snp	T	A	A:20 T:0
		49363	ins	A	AT	AT:18 A:0
		49410	complex	C	AT	AT:19 C:0
		50330	del	CTT	C	C:19 CTT:0
		50524	snp	G	A	A:20 G:0
		50708	snp	A	G	G:20 A:0	tRNA	+			intergenic_region n.50708A>G		trnL-UAA	tRNA-Leu
		50974	snp	C	A	A:20 C:0
		55201	snp	G	T	T:20 G:0
		56906	snp	C	T	T:20 C:0	CDS	-	373/1497	125/498	missense_variant c.373G>A p.Asp125Asn		atpB	ATP synthase CF1 beta subunit
		57302	ins	A	AT	AT:18 A:0
		57793	ins	G	GA	GA:18 G:0
		57949	ins	A	AT	AT:19 A:0
		58709	snp	A	G	G:20 A:0	CDS	+	655/1428	219/475	missense_variant c.655A>G p.Ile219Val		rbcL	ribulose-1,5-bisphosphate carboxylase/oxygenase large subunit
		60940	snp	A	C	C:20 A:0	CDS	+	958/1608	320/535	missense_variant c.958A>C p.Thr320Pro		accD	acetyl-CoA carboxylase beta subunit
		60996	snp	C	A	A:20 C:0	CDS	+	1014/1608	338/535	missense_variant c.1014C>A p.Asp338Glu		accD	acetyl-CoA carboxylase beta subunit
		61087	snp	T	C	C:20 T:0	CDS	+	1105/1608	369/535	missense_variant c.1105T>C p.Phe369Leu		accD	acetyl-CoA carboxylase beta subunit
		62022	complex	TT	G	G:18 TT:0
		63590	ins	G	GT	GT:19 G:0
		66748	snp	T	G	G:20 T:0
		67113	snp	A	T	T:20 A:0
		69031	del	TA	T	T:18 TA:0
		71009	snp	C	A	A:20 C:0
		72451	snp	A	C	C:20 A:0
		73935	del	CT	C	C:18 CT:0
		74028	ins	G	GT	GT:18 G:0
		74726	del	GA	G	G:18 GA:0
		75080	ins	C	CT	CT:18 C:0
		75735	snp	C	G	G:20 C:0
		77555	snp	C	G	G:20 C:0
		78347	ins	C	CACA	CACA:20 C:0
		78990	ins	T	TA	TA:20 T:0
		79048	snp	A	C	C:20 A:0
		79934	snp	G	C	C:20 G:0
		79975	snp	T	G	G:20 T:0
		81489	ins	A	ATT	ATT:19 A:0
		81549	snp	G	T	T:20 G:0
		81935	snp	T	G	G:20 T:0	CDS	-	638/984	213/327	missense_variant c.638A>C p.Glu213Ala		rpoA	RNA polymerase alpha subunit
		83630	ins	A	AT	AT:17 A:0
		84768	del	CAA	C	C:18 CAA:0
		85395	ins	G	GT	GT:19 G:0
		85428	complex	TT	G	G:18 TT:0
		85763	snp	T	G	G:20 T:0
		87163	complex	GTTCTTA	ACTCCAT	ACTCCAT:17 GTTCTTA:0	CDS	-	441/642	145/213	missense_variant c.435_441delTAAGAACinsATGGAGT p.LysAsn146TrpSer		rpl22	ribosomal protein L22
		114544	snp	G	A	A:20 G:0	CDS	-	2019/2223	673/740	synonymous_variant c.2019C>T p.Ser673Ser		ndhF	NADH-plastoquinone oxidoreductase subunit 5
		116640	ins	T	TAA	TAA:18 T:0
		116717	ins	T	TA	TA:18 T:0
		117064	del	GA	G	G:18 GA:0
		117200	snp	A	C	C:20 A:0
		117301	ins	A	AT	AT:19 A:0
		117451	snp	A	G	G:20 A:0
		117506	snp	A	T	T:20 A:0
		117739	snp	G	C	C:20 G:0
		117756	snp	G	A	A:20 G:0
		118010	snp	A	C	C:20 A:0
		118036	ins	A	AT	AT:18 A:0
		118109	snp	G	A	A:20 G:0
		118660	del	ATT	A	A:18 ATT:0
		119118	snp	C	T	T:20 C:0	CDS	+	441/960	147/319	synonymous_variant c.441C>T p.Tyr147Tyr		ccsA	cytochrome cheme attachment protein
		119719	ins	A	AACCTTTTGAATCACCAC	AACCTTTTGAATCACCAC:16 A:0
		121575	del	TG	T	T:19 TG:0
		122033	ins	A	AT	AT:19 A:0
		122517	snp	G	T	T:20 G:0
		122568	snp	T	G	G:20 T:0
		124253	snp	A	G	G:20 A:0	CDS	-	790/1092	264/363	synonymous_variant c.790T>C p.Leu264Leu		ndhA	NADH-plastoquinone oxidoreductase subunit 1
		125031	snp	A	C	C:20 A:0
		127150	snp	T	A	A:20 T:0	CDS	-	177/1182	59/393	synonymous_variant c.177A>T p.Thr59Thr		ndhH	NADH-plastoquinone oxidoreductase subunit 7
		127417	snp	C	A	A:20 C:0
		127707	ins	C	CCTT	CCTT:17 C:0
		129399	snp	T	G	G:20 T:0	CDS	-	3969/5325	1323/1774	missense_variant c.3969A>C p.Arg1323Ser		ycf1	hypothetical chloroplast RF19
		129756	snp	G	A	A:20 G:0	CDS	-	3612/5325	1204/1774	synonymous_variant c.3612C>T p.Ser1204Ser		ycf1	hypothetical chloroplast RF19
		129834	snp	C	G	G:20 C:0	CDS	-	3534/5325	1178/1774	synonymous_variant c.3534G>C p.Ser1178Ser		ycf1	hypothetical chloroplast RF19
		130030	snp	G	A	A:20 G:0	CDS	-	3338/5325	1113/1774	missense_variant c.3338C>T p.Thr1113Ile		ycf1	hypothetical chloroplast RF19
		130117	snp	C	A	A:20 C:0	CDS	-	3251/5325	1084/1774	missense_variant c.3251G>T p.Arg1084Ile		ycf1	hypothetical chloroplast RF19
		130211	snp	G	T	T:20 G:0	CDS	-	3157/5325	1053/1774	missense_variant c.3157C>A p.Leu1053Ile		ycf1	hypothetical chloroplast RF19
		130470	snp	C	A	A:20 C:0	CDS	-	2898/5325	966/1774	missense_variant c.2898G>T p.Arg966Ser		ycf1	hypothetical chloroplast RF19
		131410	snp	G	T	T:20 G:0	CDS	-	1958/5325	653/1774	missense_variant c.1958C>A p.Thr653Lys		ycf1	hypothetical chloroplast RF19
		131727	snp	G	T	T:20 G:0	CDS	-	1641/5325	547/1774	missense_variant c.1641C>A p.Asp547Glu		ycf1	hypothetical chloroplast RF19
		132143	snp	C	T	T:18 C:0	CDS	-	1225/5325	409/1774	missense_variant c.1225G>A p.Ala409Thr		ycf1	hypothetical chloroplast RF19
Section 3 SNPs and INDEL detected between Xylocarpus rumphii and Xylocarpus moluccensis
Reference	Qurey	POS	TYPE	REF	ALT	EVIDENCE	FTYPE	STRAND	NT_POS	AA_POS	EFFECT	LOCUS_TAG	GENE	PRODUCT
Xylocarpus rumphii [MH330687]	Xylocarpus granatum [MH348155.1]	209	snp	C	A	A:18 C:0
		235	snp	T	A	A:20 T:0
		248	snp	A	T	T:21 A:0
		276	snp	C	A	A:20 C:0
		322	snp	G	T	T:20 G:0
		396	ins	T	TA	TA:20 T:0
		422	snp	A	T	T:20 A:0
		432	del	GA	G	G:19 GA:0
		469	snp	A	C	C:20 A:0
		524	snp	A	C	C:20 A:0
		874	snp	G	A	A:20 G:0	CDS	-	717/1062	239/353	synonymous_variant c.717C>T p.Phe239Phe		psbA	photosystem II protein D1
		1616	snp	T	G	G:20 T:0
		1686	snp	T	C	C:20 T:0
		2012	del	CTCTTCTT	C	C:19 CTCTTCTT:0
		2068	snp	C	T	T:20 C:0
		2167	snp	A	C	C:20 A:0
		2178	snp	G	A	A:20 G:0
		2191	snp	C	A	A:20 C:0
		2261	snp	C	A	A:20 C:0	CDS	-	1449/1518	483/505	synonymous_variant c.1449G>T p.Arg483Arg		matK	maturase K
		2401	snp	C	G	G:20 C:0	CDS	-	1309/1518	437/505	missense_variant c.1309G>C p.Val437Leu		matK	maturase K
		2695	complex	TTC	ATT	ATT:19 TTC:0	CDS	-	1015/1518	338/505	missense_variant c.1013_1015delGAAinsAAT p.ArgIle338GlnLeu		matK	maturase K
		2705	snp	A	G	G:20 A:0	CDS	-	1005/1518	335/505	synonymous_variant c.1005T>C p.Ser335Ser		matK	maturase K
		2714	snp	T	G	G:20 T:0	CDS	-	996/1518	332/505	synonymous_variant c.996A>C p.Gly332Gly		matK	maturase K
		2726	snp	A	G	G:20 A:0	CDS	-	984/1518	328/505	synonymous_variant c.984T>C p.Ile328Ile		matK	maturase K
		2920	snp	T	C	C:20 T:0	CDS	-	790/1518	264/505	missense_variant c.790A>G p.Asn264Asp		matK	maturase K
		3172	snp	A	G	G:20 A:0	CDS	-	538/1518	180/505	missense_variant c.538T>C p.Phe180Leu		matK	maturase K
		3233	snp	G	A	A:20 G:0	CDS	-	477/1518	159/505	synonymous_variant c.477C>T p.Ile159Ile		matK	maturase K
		3302	snp	T	G	G:20 T:0	CDS	-	408/1518	136/505	missense_variant c.408A>C p.Leu136Phe		matK	maturase K
		3712	snp	T	G	G:20 T:0
		3797	del	TA	T	T:19 TA:0
		3964	snp	C	A	A:20 C:0
		4053	snp	T	G	G:20 T:0
		4391	snp	C	T	T:20 C:0
		4874	ins	T	TA	TA:19 T:0
		4906	snp	G	T	T:20 G:0
		5309	del	CT	C	C:18 CT:0
		5719	ins	C	CTTTCTT	CTTTCTT:17 C:0
		6041	snp	G	T	T:20 G:0
		6132	snp	T	C	C:20 T:0
		6253	snp	T	G	G:20 T:0
		6554	ins	C	CT	CT:18 C:0
		6623	snp	C	A	A:20 C:0
		6910	snp	A	T	T:20 A:0
		7030	del	TAA	T	T:19 TAA:0
		7162	snp	A	C	C:20 A:0
		7526	complex	GATTTTTG	T	T:17 GATTTTTG:0
		7585	snp	C	G	G:20 C:0
		7795	snp	T	G	G:20 T:0
		8003	snp	T	C	C:20 T:0
		8105	snp	C	A	A:20 C:0
		8205	ins	A	AT	AT:19 A:0
		8381	snp	C	G	G:20 C:0	CDS	+	71/186	24/61	missense_variant c.71C>G p.Ala24Gly		psbK	photosystem II protein K
		8443	snp	A	G	G:20 A:0	CDS	+	133/186	45/61	missense_variant c.133A>G p.Ile45Val		psbK	photosystem II protein K
		8627	snp	T	G	G:20 T:0
		9097	snp	A	C	C:20 A:0
		9209	ins	G	GAAA	GAAA:14 G:0
		9286	complex	ATTT	CTTG	CTTG:15 ATTT:0
		9314	snp	G	T	T:13 G:0
		9319	ins	T	TACTATATTATTTTAGTATATTA	TACTATATTATTTTAGTATATTA:10 T:0
		9366	ins	A	ATTTAG	ATTTAG:15 A:0
		9460	del	TATTC	T	T:14 TATTC:0
		9751	snp	G	C	C:20 G:0
		9889	snp	C	A	A:20 C:0
		9964	del	CT	C	C:19 CT:0
		10534	snp	G	A	A:20 G:0
		10619	del	CGTCTTAG	C	C:18 CGTCTTAG:0
		10830	snp	T	A	A:20 T:0
		10906	snp	A	G	G:20 A:0
		11052	snp	C	T	T:20 C:0
		11203	snp	C	A	A:20 C:0	CDS	-	1380/1521	460/506	missense_variant c.1380G>T p.Glu460Asp		atpA	ATP synthase CF1 alpha subunit
		11935	snp	C	A	A:20 C:0	CDS	-	648/1521	216/506	missense_variant c.648G>T p.Arg216Ser		atpA	ATP synthase CF1 alpha subunit
		12636	snp	T	G	G:20 T:0
		13184	ins	C	CT	CT:19 C:0
		13489	ins	G	GA	GA:18 G:0
		13695	snp	G	A	A:20 G:0
		13722	snp	T	A	A:20 T:0
		13750	ins	G	GAAA	GAAA:18 G:0
		13989	snp	G	T	T:20 G:0
		13995	ins	C	CT	CT:19 C:0
		14025	complex	C	TA	TA:19 C:0
		14071	del	GT	G	G:18 GT:0
		14472	snp	T	G	G:20 T:0	CDS	-	201/246	67/81	synonymous_variant c.201A>C p.Gly67Gly		atpH	ATP synthase CF0 subunit III
		15411	snp	T	C	C:20 T:0
		15423	snp	A	C	C:20 A:0
		16478	snp	A	G	G:20 A:0	CDS	-	135/744	45/247	synonymous_variant c.135T>C p.Val45Val		atpI	ATP synthase CF0 subunit IV
		16872	snp	A	G	G:20 A:0	CDS	-	700/702	234/233	stop_lost&splice_region_variant c.700T>C p.Ter234Argext*?		rps2	ribosomal protein S2
		16974	snp	C	A	A:20 C:0	CDS	-	598/702	200/233	missense_variant c.598G>T p.Ala200Ser		rps2	ribosomal protein S2
		17172	snp	T	G	G:20 T:0	CDS	-	400/702	134/233	missense_variant c.400A>C p.Thr134Pro		rps2	ribosomal protein S2
		17181	snp	T	G	G:20 T:0	CDS	-	391/702	131/233	missense_variant c.391A>C p.Ser131Arg		rps2	ribosomal protein S2
		17302	snp	C	G	G:20 C:0	CDS	-	270/702	90/233	missense_variant c.270G>C p.Arg90Ser		rps2	ribosomal protein S2
		17478	snp	T	C	C:20 T:0	CDS	-	94/702	32/233	missense_variant c.94A>G p.Thr32Ala		rps2	ribosomal protein S2
		17542	snp	C	A	A:20 C:0	CDS	-	30/702	10/233	missense_variant c.30G>T p.Leu10Phe		rps2	ribosomal protein S2
		17585	snp	C	A	A:20 C:0
		17923	snp	C	A	A:20 C:0	CDS	-	4041/4194	1347/1397	missense_variant c.4041G>T p.Gln1347His		rpoC2	RNA polymerase beta'' subunit
		18146	snp	G	C	C:20 G:0	CDS	-	3818/4194	1273/1397	missense_variant c.3818C>G p.Thr1273Arg		rpoC2	RNA polymerase beta'' subunit
		18466	snp	C	T	T:20 C:0	CDS	-	3498/4194	1166/1397	synonymous_variant c.3498G>A p.Ser1166Ser		rpoC2	RNA polymerase beta'' subunit
		18882	snp	T	G	G:20 T:0	CDS	-	3082/4194	1028/1397	missense_variant c.3082A>C p.Thr1028Pro		rpoC2	RNA polymerase beta'' subunit
		18978	snp	A	C	C:20 A:0	CDS	-	2986/4194	996/1397	missense_variant c.2986T>G p.Phe996Val		rpoC2	RNA polymerase beta'' subunit
		19035	snp	G	T	T:20 G:0	CDS	-	2929/4194	977/1397	missense_variant c.2929C>A p.Gln977Lys		rpoC2	RNA polymerase beta'' subunit
		19542	snp	G	A	A:20 G:0	CDS	-	2422/4194	808/1397	synonymous_variant c.2422C>T p.Leu808Leu		rpoC2	RNA polymerase beta'' subunit
		20043	snp	A	C	C:20 A:0	CDS	-	1921/4194	641/1397	missense_variant c.1921T>G p.Ser641Ala		rpoC2	RNA polymerase beta'' subunit
		20228	snp	T	C	C:20 T:0	CDS	-	1736/4194	579/1397	missense_variant c.1736A>G p.Lys579Arg		rpoC2	RNA polymerase beta'' subunit
		20602	snp	G	C	C:20 G:0	CDS	-	1362/4194	454/1397	synonymous_variant c.1362C>G p.Val454Val		rpoC2	RNA polymerase beta'' subunit
		20884	snp	G	T	T:20 G:0	CDS	-	1080/4194	360/1397	synonymous_variant c.1080C>A p.Ile360Ile		rpoC2	RNA polymerase beta'' subunit
		21184	snp	C	G	G:20 C:0	CDS	-	780/4194	260/1397	missense_variant c.780G>C p.Met260Ile		rpoC2	RNA polymerase beta'' subunit
		21598	snp	A	G	G:20 A:0	CDS	-	366/4194	122/1397	synonymous_variant c.366T>C p.Thr122Thr		rpoC2	RNA polymerase beta'' subunit
		22065	snp	A	C	C:20 A:0
		23079	snp	G	A	A:20 G:0	CDS	-	1111/2043	371/680	synonymous_variant c.1111C>T p.Leu371Leu		rpoC1	RNA polymerase beta' subunit
		23510	del	GGTC	G	G:19 GGTC:0	CDS	-	679/2043	226/680	disruptive_inframe_deletion c.677_679delGAC p.Gly226_Pro227delinsAla		rpoC1	RNA polymerase beta' subunit
		23837	snp	C	G	G:13 C:0
		23865	snp	C	T	T:13 C:0
		24415	snp	C	A	A:20 C:0
		26107	snp	G	C	C:20 G:0	CDS	-	2091/3213	697/1070	synonymous_variant c.2091C>G p.Val697Val		rpoB	RNA polymerase beta subunit
		26640	snp	T	G	G:20 T:0	CDS	-	1558/3213	520/1070	missense_variant c.1558A>C p.Thr520Pro		rpoB	RNA polymerase beta subunit
		26852	snp	G	A	A:20 G:0	CDS	-	1346/3213	449/1070	missense_variant c.1346C>T p.Ser449Phe		rpoB	RNA polymerase beta subunit
		27223	snp	G	A	A:20 G:0	CDS	-	975/3213	325/1070	synonymous_variant c.975C>T p.Phe325Phe		rpoB	RNA polymerase beta subunit
		28216	snp	C	A	A:20 C:0
		28268	snp	T	G	G:20 T:0
		28784	snp	A	T	T:20 A:0
		28839	ins	A	AT	AT:18 A:0
		28889	snp	G	T	T:20 G:0
		28942	snp	A	G	G:20 A:0
		29108	ins	C	CAAA	CAAA:18 C:0
		29697	snp	C	G	G:20 C:0
		29838	snp	A	G	G:20 A:0
		30175	del	CT	C	C:19 CT:0
		30216	del	TTTTAATTA	T	T:18 TTTTAATTA:0
		30798	del	ATT	A	A:18 ATT:0
		31130	snp	C	T	T:20 C:0
		31178	del	AT	A	A:19 AT:0
		31431	snp	T	G	G:17 T:0
		31609	ins	T	TAATACTTTATTTATAATACTTTA	TAATACTTTATTTATAATACTTTA:13 T:0
		31807	snp	G	T	T:17 G:0
		31857	ins	A	ATT	ATT:18 A:0
		32178	ins	G	GA	GA:19 G:0
		32718	snp	T	C	C:20 T:0
		32899	snp	C	A	A:20 C:0
		32909	ins	C	CT	CT:20 C:0
		32938	complex	GG	A	A:18 GG:0
		33112	snp	G	T	T:20 G:0
		34055	snp	T	C	C:20 T:0
		34093	snp	C	G	G:20 C:0
		34101	snp	C	T	T:20 C:0
		34380	snp	A	T	T:20 A:0
		34552	ins	C	CA	CA:19 C:0
		37429	complex	TCCTCCC	GGGAGGA	GGGAGGA:16 TCCTCCC:0
		37485	del	CA	C	C:18 CA:0
		37730	snp	T	G	G:20 T:0
		37772	del	TA	T	T:18 TA:0
		37823	snp	G	T	T:20 G:0
		37953	snp	C	G	G:20 C:0
		38682	snp	C	T	T:12 C:0	tRNA	+			non_coding_transcript_variant		trnG-UCC	tRNA-Gly
		38891	del	CAAAAAAA	C	C:17 CAAAAAAA:0
		39137	snp	T	G	G:20 T:0
		39319	snp	A	C	C:20 A:0	CDS	-	134/303	45/100	missense_variant c.134T>G p.Val45Gly		rps14	ribosomal protein S14
		40520	snp	C	G	G:20 C:0	CDS	-	1281/2205	427/734	synonymous_variant c.1281G>C p.Leu427Leu		psaB	photosystem I P700 apoprotein A2
		41261	snp	T	C	C:20 T:0	CDS	-	540/2205	180/734	synonymous_variant c.540A>G p.Ser180Ser		psaB	photosystem I P700 apoprotein A2
		42015	snp	T	C	C:20 T:0	CDS	-	2064/2253	688/750	synonymous_variant c.2064A>G p.Gly688Gly		psaA	photosystem I P700 apoprotein A1
		44372	snp	A	T	T:20 A:0
		45007	complex	AAGT	CAG	CAG:19 AAGT:0
		45131	snp	G	T	T:20 G:0
		45219	snp	T	G	G:20 T:0
		45614	snp	N	A	A:18 N:0
		45627	snp	N	A	A:18 N:0
		45639	snp	N	A	A:16 N:0
		45659	del	CCCCCCCTTTTTTTTTTTCTTTTACTTTT	C	C:14 CCCCCCCTTTTTTTTTTTCTTTTACTTTT:0
		46146	snp	C	T	T:20 C:0
		46203	snp	A	C	C:20 A:0
		46405	snp	C	A	A:20 C:0
		47195	snp	G	C	C:20 G:0
		47382	del	AAAAAAT	A	A:18 AAAAAAT:0
		47486	complex	GA	TC	TC:19 GA:0
		47494	snp	C	G	G:20 C:0
		47585	snp	A	C	C:20 A:0
		47596	snp	G	A	A:20 G:0
		47845	snp	A	C	C:20 A:0
		48244	snp	G	T	T:20 G:0	CDS	-	437/606	146/201	missense_variant c.437C>A p.Ala146Asp		rps4	ribosomal protein S4
		48322	snp	C	T	T:20 C:0	CDS	-	359/606	120/201	missense_variant c.359G>A p.Gly120Asp		rps4	ribosomal protein S4
		48851	del	TA	T	T:19 TA:0
		49174	snp	A	G	G:20 A:0
		49327	snp	C	T	T:20 C:0
		49363	del	AT	A	A:18 AT:0
		49410	ins	C	CT	CT:18 C:0
		49735	snp	C	A	A:20 C:0
		50330	del	CT	C	C:18 CT:0
		50455	ins	C	CA	CA:20 C:0
		50708	snp	A	G	G:20 A:0	tRNA	+			intergenic_region n.50708A>G		trnL-UAA	tRNA-Leu
		50970	snp	T	C	C:20 T:0
		51193	snp	A	C	C:20 A:0
		51556	snp	G	T	T:20 G:0
		52887	del	AT	A	A:17 AT:0
		53645	snp	T	G	G:20 T:0
		53864	ins	C	CAAAGA	CAAAGA:18 C:0
		54019	del	TG	T	T:19 TG:0
		54107	snp	G	T	T:20 G:0
		54156	snp	T	G	G:20 T:0
		55746	snp	C	T	T:20 C:0	CDS	-	40/402	14/133	missense_variant c.40G>A p.Val14Ile		atpE	ATP synthase CF1 epsilon subunit
		55930	snp	T	C	C:20 T:0	CDS	-	1349/1497	450/498	missense_variant c.1349A>G p.Asp450Gly		atpB	ATP synthase CF1 beta subunit
		55952	snp	C	T	T:20 C:0	CDS	-	1327/1497	443/498	missense_variant c.1327G>A p.Gly443Ser		atpB	ATP synthase CF1 beta subunit
		56141	snp	G	C	C:20 G:0	CDS	-	1138/1497	380/498	missense_variant c.1138C>G p.Leu380Val		atpB	ATP synthase CF1 beta subunit
		57302	ins	A	ATTTT	ATTTT:18 A:0
		57520	snp	T	G	G:20 T:0
		57793	del	GA	G	G:19 GA:0
		58709	snp	A	G	G:20 A:0	CDS	+	655/1428	219/475	missense_variant c.655A>G p.Ile219Val		rbcL	ribulose-1,5-bisphosphate carboxylase/oxygenase large subunit
		59615	snp	C	T	T:20 C:0
		59657	snp	C	G	G:20 C:0
		59896	snp	C	A	A:20 C:0
		60249	snp	C	A	A:20 C:0	CDS	+	267/1608	89/535	missense_variant c.267C>A p.Asp89Glu		accD	acetyl-CoA carboxylase beta subunit
		60282	snp	C	A	A:20 C:0	CDS	+	300/1608	100/535	missense_variant c.300C>A p.Asn100Lys		accD	acetyl-CoA carboxylase beta subunit
		60885	snp	T	G	G:12 T:0	CDS	+	903/1608	301/535	missense_variant c.903T>G p.Phe301Leu		accD	acetyl-CoA carboxylase beta subunit
		60893	snp	T	G	G:13 T:0	CDS	+	911/1608	304/535	missense_variant c.911T>G p.Ile304Ser		accD	acetyl-CoA carboxylase beta subunit
		60940	snp	A	C	C:17 A:0	CDS	+	958/1608	320/535	missense_variant c.958A>C p.Thr320Pro		accD	acetyl-CoA carboxylase beta subunit
		60996	snp	C	A	A:20 C:0	CDS	+	1014/1608	338/535	missense_variant c.1014C>A p.Asp338Glu		accD	acetyl-CoA carboxylase beta subunit
		61446	snp	A	G	G:20 A:0	CDS	+	1464/1608	488/535	synonymous_variant c.1464A>G p.Lys488Lys		accD	acetyl-CoA carboxylase beta subunit
		61489	snp	G	C	C:20 G:0	CDS	+	1507/1608	503/535	missense_variant c.1507G>C p.Asp503His		accD	acetyl-CoA carboxylase beta subunit
		61738	del	AT	A	A:18 AT:0
		61937	snp	A	C	C:20 A:0
		61944	snp	A	C	C:20 A:0
		61968	snp	T	C	C:20 T:0
		62016	complex	TTTTTTTT	ATTTTTTTG	ATTTTTTTG:18 TTTTTTTT:0
		62460	snp	A	C	C:20 A:0
		62770	snp	T	C	C:20 T:0
		62834	snp	C	A	A:20 C:0
		63025	snp	T	A	A:20 T:0	CDS	+	174/555	58/184	missense_variant c.174T>A p.Asn58Lys		ycf4	photosystem I assembly protein Ycf4
		63073	snp	C	A	A:20 C:0	CDS	+	222/555	74/184	synonymous_variant c.222C>A p.Leu74Leu		ycf4	photosystem I assembly protein Ycf4
		63569	del	TTTTTTGTCTACAAAAAAATTG	T	T:16 TTTTTTGTCTACAAAAAAATTG:0
		64682	snp	C	G	G:20 C:0	CDS	+	339/699	113/232	missense_variant c.339C>G p.Phe113Leu		cemA	chloroplast envelope membrane protein
		64746	snp	G	C	C:20 G:0	CDS	+	403/699	135/232	missense_variant c.403G>C p.Val135Leu		cemA	chloroplast envelope membrane protein
		64883	snp	A	C	C:20 A:0	CDS	+	540/699	180/232	synonymous_variant c.540A>C p.Val180Val		cemA	chloroplast envelope membrane protein
		64902	snp	T	G	G:20 T:0	CDS	+	559/699	187/232	missense_variant c.559T>G p.Ser187Ala		cemA	chloroplast envelope membrane protein
		65052	snp	A	C	C:20 A:0
		66419	snp	T	G	G:20 T:0
		66580	snp	T	C	C:20 T:0
		66600	ins	A	AG	AG:20 A:0
		66799	del	TA	T	T:19 TA:0
		66989	snp	G	T	T:20 G:0
		67113	snp	A	T	T:20 A:0
		67444	snp	C	A	A:20 C:0
		68386	del	TAGAAA	T	T:18 TAGAAA:0
		68623	ins	C	CT	CT:19 C:0
		68770	snp	A	C	C:20 A:0
		69783	ins	C	CTTTCT	CTTTCT:18 C:0
		70004	ins	C	CGTT	CGTT:18 C:0
		70106	snp	C	G	G:20 C:0
		70162	snp	T	C	C:20 T:0	tRNA	-			non_coding_transcript_variant		trnP-UGG	tRNA-Pro
		70476	snp	C	A	A:20 C:0
		70777	del	CT	C	C:18 CT:0
		70992	snp	G	T	T:20 G:0
		71212	snp	C	G	G:20 C:0	CDS	+	63/201	21/66	missense_variant c.63C>G p.Asn21Lys		rpl33	ribosomal protein L33
		71504	snp	G	A	A:20 G:0
		71665	snp	A	T	T:20 A:0	CDS	+	118/306	40/101	missense_variant c.118A>T p.Ile40Phe		rps18	ribosomal protein S18
		71956	ins	C	CTTT	CTTT:18 C:0
		73074	snp	T	G	G:20 T:0
		73298	snp	G	T	T:20 G:0	CDS	.	277/381	93/126	missense_variant c.277C>A p.Leu93Ile		rps12	ribosomal protein S12
		73517	snp	C	G	G:20 C:0	CDS	-	542/588	181/195	missense_variant c.542G>C p.Arg181Thr		clpP	ATP-dependent Clp protease proteolytic subunit
		74390	snp	T	G	G:20 T:0	CDS	-	329/588	110/195	missense_variant c.329A>C p.Lys110Thr		clpP	ATP-dependent Clp protease proteolytic subunit
		74434	snp	G	A	A:20 G:0	CDS	-	285/588	95/195	synonymous_variant c.285C>T p.Tyr95Tyr		clpP	ATP-dependent Clp protease proteolytic subunit
		74473	snp	G	C	C:20 G:0	CDS	-	246/588	82/195	stop_gained c.246C>G p.Tyr82*		clpP	ATP-dependent Clp protease proteolytic subunit
		74595	snp	A	C	C:20 A:0	CDS	-	124/588	42/195	missense_variant c.124T>G p.Tyr42Asp		clpP	ATP-dependent Clp protease proteolytic subunit
		75006	snp	C	G	G:20 C:0
		75532	complex	TGGGATTTTT	CGTGACTTCG	CGTGACTTCG:18 TGGGATTTTT:0	CDS	-	40/588	11/195	missense_variant c.31_40delAAAAATCCCAinsCGAAGTCACG p.LysAsnProArg11ArgSerHisGly		clpP	ATP-dependent Clp protease proteolytic subunit
		75656	snp	G	T	T:19 G:0
		75664	ins	C	CATA	CATA:18 C:0
		75925	ins	A	AAAG	AAAG:18 A:0
		75984	snp	G	C	C:20 G:0
		76294	snp	G	C	C:20 G:0	CDS	+	291/1527	97/508	synonymous_variant c.291G>C p.Ala97Ala		psbB	photosystem II CP47 chlorophyll apoprotein
		77555	snp	C	G	G:20 C:0
		77633	complex	GATTCTT	TGATTC	TGATTC:18 GATTCTT:0
		78396	ins	A	AT	AT:18 A:0
		78524	snp	A	G	G:20 A:0
		78835	del	GGACTT	G	G:19 GGACTT:0
		78990	ins	T	TA	TA:19 T:0
		79168	snp	G	C	C:20 G:0
		79182	snp	G	C	C:20 G:0
		79573	snp	G	A	A:20 G:0	CDS	+	297/648	99/215	synonymous_variant c.297G>A p.Leu99Leu		petB	cytochrome b6
		79624	snp	G	A	A:20 G:0	CDS	+	348/648	116/215	synonymous_variant c.348G>A p.Leu116Leu		petB	cytochrome b6
		79681	snp	C	T	T:20 C:0	CDS	+	405/648	135/215	synonymous_variant c.405C>T p.Gly135Gly		petB	cytochrome b6
		79735	snp	T	C	C:20 T:0	CDS	+	459/648	153/215	synonymous_variant c.459T>C p.Gly153Gly		petB	cytochrome b6
		80048	snp	G	T	T:20 G:0
		80255	ins	T	TGGTTC	TGGTTC:18 T:1
		80749	ins	C	CT	CT:19 C:0
		81489	ins	A	AT	AT:19 A:0
		81549	snp	G	T	T:20 G:0
		82034	snp	A	C	C:20 A:0	CDS	-	539/984	180/327	missense_variant c.539T>G p.Leu180Arg		rpoA	RNA polymerase alpha subunit
		82119	snp	C	G	G:20 C:0	CDS	-	454/984	152/327	missense_variant c.454G>C p.Glu152Gln		rpoA	RNA polymerase alpha subunit
		82255	snp	T	C	C:20 T:0	CDS	-	318/984	106/327	synonymous_variant c.318A>G p.Ala106Ala		rpoA	RNA polymerase alpha subunit
		82812	snp	C	T	T:19 C:0	CDS	-	242/417	81/138	missense_variant c.242G>A p.Arg81Gln		rps11	ribosomal protein S11
		82954	snp	C	T	T:19 C:0	CDS	-	100/417	34/138	missense_variant c.100G>A p.Ala34Thr		rps11	ribosomal protein S11
		83007	complex	ATCC	CCCT	CCCT:18 ATCC:0	CDS	-	47/417	15/138	missense_variant c.44_47delGGATinsAGGG p.ArgIle15GlnGly		rps11	ribosomal protein S11
		83016	snp	T	G	G:19 T:0	CDS	-	38/417	13/138	missense_variant c.38A>C p.Asn13Thr		rps11	ribosomal protein S11
		83022	snp	C	T	T:20 C:0	CDS	-	32/417	11/138	missense_variant c.32G>A p.Arg11His		rps11	ribosomal protein S11
		83066	ins	C	CATAAAT	CATAAAT:18 C:0
		83341	snp	G	C	C:20 G:0
		83399	snp	G	C	C:20 G:0
		83630	ins	A	AT	AT:18 A:0
		83699	snp	A	G	G:20 A:0
		83714	complex	GAT	TA	TA:18 GAT:0
		83969	snp	G	C	C:20 G:0	CDS	-	207/405	69/134	missense_variant c.207C>G p.Ser69Arg		rps8	ribosomal protein S8
		84227	del	CT	C	C:19 CT:0
		84309	snp	C	A	A:20 C:0
		84618	snp	C	G	G:20 C:0	CDS	-	89/369	30/122	missense_variant c.89G>C p.Arg30Pro		rpl14	ribosomal protein L14
		84655	snp	C	T	T:20 C:0	CDS	-	52/369	18/122	missense_variant c.52G>A p.Glu18Lys		rpl14	ribosomal protein L14
		84985	snp	T	C	C:20 T:0	CDS	-	264/411	88/136	synonymous_variant c.264A>G p.Lys88Lys		rpl16	ribosomal protein L16
		85395	ins	G	GTTT	GTTT:19 G:0
		85423	del	CTT	C	C:18 CTT:0
		85608	snp	G	T	T:20 G:0
		85763	snp	T	G	G:20 T:0
		86625	snp	G	T	T:20 G:0	CDS	-	353/660	118/219	missense_variant c.353C>A p.Ala118Glu		rps3	ribosomal protein S3
		87139	complex	ACTCCAT	GTTCTTA	GTTCTTA:10 ACTCCAT:0	CDS	-	465/642	153/213	missense_variant c.459_465delATGGAGTinsTAAGAAC p.TrpSer154LysAsn		rpl22	ribosomal protein L22
		87180	snp	A	T	T:14 A:0	CDS	-	424/642	142/213	missense_variant c.424T>A p.Trp142Arg		rpl22	ribosomal protein L22
		87190	snp	T	C	C:15 T:0	CDS	-	414/642	138/213	synonymous_variant c.414A>G p.Lys138Lys		rpl22	ribosomal protein L22
		87203	snp	C	A	A:16 C:0	CDS	-	401/642	134/213	missense_variant c.401G>T p.Arg134Ile		rpl22	ribosomal protein L22
		87219	snp	C	T	T:17 C:0	CDS	-	385/642	129/213	missense_variant c.385G>A p.Gly129Ser		rpl22	ribosomal protein L22
		87293	snp	A	G	G:19 A:0	CDS	-	311/642	104/213	missense_variant c.311T>C p.Ile104Thr		rpl22	ribosomal protein L22
		87339	snp	C	G	G:20 C:0	CDS	-	265/642	89/213	missense_variant c.265G>C p.Ala89Pro		rpl22	ribosomal protein L22
		87388	snp	A	G	G:17 A:0	repeat_region	+	216/642	72/213	synonymous_variant c.216T>C p.Phe72Phe
		114348	ins	T	TAACAAG	TAACAAG:10 T:0	CDS	-	1054/1104	352/367	conservative_inframe_insertion c.1053_1054insACAAGA p.Leu351_Leu352insThrArg		ndhF	NADH-plastoquinone oxidoreductase subunit 5
		114356	snp	C	G	G:11 C:0	CDS	-	1060/1104	354/367	missense_variant c.1060C>G p.Gln354Glu		ndhF	NADH-plastoquinone oxidoreductase subunit 5
		114466	snp	C	T	T:16 C:0	CDS	-	2097/2223	699/740	synonymous_variant c.2097G>A p.Gly699Gly		ndhF	NADH-plastoquinone oxidoreductase subunit 5
		114561	snp	A	C	C:20 A:0	CDS	-	2002/2223	668/740	missense_variant c.2002T>G p.Ser668Ala		ndhF	NADH-plastoquinone oxidoreductase subunit 5
		114597	snp	T	G	G:20 T:0	CDS	-	1966/2223	656/740	missense_variant c.1966A>C p.Ile656Leu		ndhF	NADH-plastoquinone oxidoreductase subunit 5
		114604	snp	G	T	T:20 G:0	CDS	-	1959/2223	653/740	synonymous_variant c.1959C>A p.Ile653Ile		ndhF	NADH-plastoquinone oxidoreductase subunit 5
		114855	snp	C	T	T:20 C:0	CDS	-	1708/2223	570/740	missense_variant c.1708G>A p.Glu570Lys		ndhF	NADH-plastoquinone oxidoreductase subunit 5
		114966	snp	T	G	G:20 T:0	CDS	-	1597/2223	533/740	missense_variant c.1597A>C p.Thr533Pro		ndhF	NADH-plastoquinone oxidoreductase subunit 5
		115276	snp	T	C	C:20 T:0	CDS	-	1287/2223	429/740	synonymous_variant c.1287A>G p.Pro429Pro		ndhF	NADH-plastoquinone oxidoreductase subunit 5
		116503	snp	C	A	A:20 C:0	CDS	-	60/2223	20/740	missense_variant c.60G>T p.Met20Ile		ndhF	NADH-plastoquinone oxidoreductase subunit 5
		116717	ins	T	TA	TA:18 T:0
		117019	del	AT	A	A:20 AT:0
		117062	complex	GAG	TAGA	TAGA:18 GAG:0
		117171	snp	G	T	T:20 G:0
		117200	snp	A	C	C:20 A:0
		117232	snp	C	T	T:20 C:0
		117301	ins	A	AT	AT:19 A:0
		117451	snp	A	G	G:20 A:0
		117544	ins	C	CT	CT:19 C:0
		117628	snp	G	T	T:20 G:0	CDS	+	71/159	24/52	missense_variant c.71G>T p.Gly24Val		rpl32	ribosomal protein L32
		117636	snp	A	G	G:20 A:0	CDS	+	79/159	27/52	missense_variant c.79A>G p.Thr27Ala		rpl32	ribosomal protein L32
		117660	snp	G	T	T:20 G:0	CDS	+	103/159	35/52	missense_variant c.103G>T p.Ala35Ser		rpl32	ribosomal protein L32
		117714	del	TAAGAA	T	T:18 TAAGAA:0	CDS	+	158/159	53/52	frameshift_variant&stop_lost&splice_region_variant c.158_*3delAAGAA p.Ter53fs		rpl32	ribosomal protein L32
		117739	snp	G	C	C:17 G:0
		118036	ins	A	AT	AT:11 A:0
		118065	snp	T	G	G:14 T:0
		118123	complex	AA	TT	TT:18 AA:0
		118191	del	GA	G	G:19 GA:0
		118346	snp	G	T	T:20 G:0
		118364	snp	T	G	G:20 T:0
		118380	snp	T	G	G:20 T:0
		118422	snp	A	T	T:20 A:0
		118643	complex	GGGT	AGGG	AGGG:19 GGGT:0
		118660	del	ATTTT	A	A:18 ATTTT:0
		119118	snp	C	T	T:20 C:0	CDS	+	441/960	147/319	synonymous_variant c.441C>T p.Tyr147Tyr		ccsA	cytochrome cheme attachment protein
		119208	snp	A	T	T:20 A:0	CDS	+	531/960	177/319	missense_variant c.531A>T p.Lys177Asn		ccsA	cytochrome cheme attachment protein
		119523	snp	T	G	G:20 T:0	CDS	+	846/960	282/319	missense_variant c.846T>G p.Phe282Leu		ccsA	cytochrome cheme attachment protein
		119548	snp	T	G	G:20 T:0	CDS	+	871/960	291/319	missense_variant c.871T>G p.Ser291Ala		ccsA	cytochrome cheme attachment protein
		119907	ins	A	ATT	ATT:19 A:0
		120545	snp	G	A	A:20 G:0	CDS	-	918/1530	306/509	synonymous_variant c.918C>T p.Gly306Gly		ndhD	NADH-plastoquinone oxidoreductase subunit 4
		121082	snp	T	C	C:20 T:0	CDS	-	381/1530	127/509	missense_variant c.381A>G p.Ile127Met		ndhD	NADH-plastoquinone oxidoreductase subunit 4
		121327	snp	T	A	A:20 T:0	CDS	-	136/1530	46/509	missense_variant c.136A>T p.Ile46Leu		ndhD	NADH-plastoquinone oxidoreductase subunit 4
		121828	snp	C	T	T:20 C:0	CDS	-	18/246	6/81	synonymous_variant c.18G>A p.Lys6Lys		psaC	photosystem I subunit VII
		121940	ins	A	AT	AT:19 A:0
		122222	snp	G	T	T:20 G:0	CDS	-	163/306	55/101	synonymous_variant c.163C>A p.Arg55Arg		ndhE	NADH-plastoquinone oxidoreductase subunit 4L
		122517	snp	G	T	T:20 G:0
		122568	snp	T	G	G:20 T:0
		122587	snp	T	G	G:20 T:0
		123875	snp	A	G	G:20 A:0
		123996	snp	A	G	G:20 A:0	CDS	-	1047/1092	349/363	synonymous_variant c.1047T>C p.Leu349Leu		ndhA	NADH-plastoquinone oxidoreductase subunit 1
		124253	snp	A	G	G:20 A:0	CDS	-	790/1092	264/363	synonymous_variant c.790T>C p.Leu264Leu		ndhA	NADH-plastoquinone oxidoreductase subunit 1
		124701	ins	T	TA	TA:19 T:0
		124747	snp	C	A	A:20 C:0
		125227	del	AT	A	A:19 AT:0
		125657	snp	T	G	G:20 T:0	CDS	-	487/1092	163/363	synonymous_variant c.487A>C p.Arg163Arg		ndhA	NADH-plastoquinone oxidoreductase subunit 1
		126431	snp	T	C	C:20 T:0	CDS	-	896/1182	299/393	missense_variant c.896A>G p.Asn299Ser		ndhH	NADH-plastoquinone oxidoreductase subunit 7
		126437	snp	T	C	C:20 T:0	CDS	-	890/1182	297/393	missense_variant c.890A>G p.Lys297Arg		ndhH	NADH-plastoquinone oxidoreductase subunit 7
		127337	snp	T	G	G:20 T:0
		127404	snp	A	C	C:20 A:0
		127701	snp	C	A	A:20 C:0
		127716	ins	T	TTA	TTA:19 T:0
		127833	snp	C	T	T:20 C:0
		128054	snp	T	G	G:20 T:0	CDS	-	5314/5325	1772/1774	missense_variant c.5314A>C p.Lys1772Gln		ycf1	hypothetical chloroplast RF19
		128456	snp	C	G	G:20 C:0	CDS	-	4912/5325	1638/1774	missense_variant c.4912G>C p.Gly1638Arg		ycf1	hypothetical chloroplast RF19
		128461	snp	A	C	C:20 A:0	CDS	-	4907/5325	1636/1774	missense_variant c.4907T>G p.Ile1636Arg		ycf1	hypothetical chloroplast RF19
		128545	snp	G	A	A:20 G:0	CDS	-	4823/5325	1608/1774	missense_variant c.4823C>T p.Pro1608Leu		ycf1	hypothetical chloroplast RF19
		128593	snp	A	G	G:20 A:0	CDS	-	4775/5325	1592/1774	missense_variant c.4775T>C p.Ile1592Thr		ycf1	hypothetical chloroplast RF19
		129030	snp	G	C	C:20 G:0	CDS	-	4338/5325	1446/1774	missense_variant c.4338C>G p.Cys1446Trp		ycf1	hypothetical chloroplast RF19
		129915	snp	T	A	A:20 T:0	CDS	-	3453/5325	1151/1774	missense_variant c.3453A>T p.Lys1151Asn		ycf1	hypothetical chloroplast RF19
		129948	complex	GTT	ATC	ATC:19 GTT:0	CDS	-	3420/5325	1140/1774	missense_variant c.3418_3420delAACinsGAT p.Asn1140Asp		ycf1	hypothetical chloroplast RF19
		129968	snp	C	A	A:20 C:0	CDS	-	3400/5325	1134/1774	missense_variant c.3400G>T p.Asp1134Tyr		ycf1	hypothetical chloroplast RF19
		130171	snp	A	T	T:20 A:0	CDS	-	3197/5325	1066/1774	missense_variant c.3197T>A p.Phe1066Tyr		ycf1	hypothetical chloroplast RF19
		130235	snp	T	A	A:20 T:0	CDS	-	3133/5325	1045/1774	missense_variant c.3133A>T p.Thr1045Ser		ycf1	hypothetical chloroplast RF19
		130250	snp	T	G	G:20 T:0	CDS	-	3118/5325	1040/1774	missense_variant c.3118A>C p.Lys1040Gln		ycf1	hypothetical chloroplast RF19
		130257	snp	G	T	T:20 G:0	CDS	-	3111/5325	1037/1774	synonymous_variant c.3111C>A p.Ile1037Ile		ycf1	hypothetical chloroplast RF19
		130538	snp	C	T	T:20 C:0	CDS	-	2830/5325	944/1774	missense_variant c.2830G>A p.Val944Ile		ycf1	hypothetical chloroplast RF19
		130646	snp	G	T	T:20 G:0	CDS	-	2722/5325	908/1774	missense_variant c.2722C>A p.Arg908Ser		ycf1	hypothetical chloroplast RF19
		130736	snp	A	G	G:20 A:0	CDS	-	2632/5325	878/1774	synonymous_variant c.2632T>C p.Leu878Leu		ycf1	hypothetical chloroplast RF19
		131196	snp	C	A	A:20 C:0	CDS	-	2172/5325	724/1774	synonymous_variant c.2172G>T p.Thr724Thr		ycf1	hypothetical chloroplast RF19
		131213	snp	A	C	C:20 A:0	CDS	-	2155/5325	719/1774	missense_variant c.2155T>G p.Tyr719Asp		ycf1	hypothetical chloroplast RF19
		131856	snp	G	T	T:20 G:0	CDS	-	1512/5325	504/1774	synonymous_variant c.1512C>A p.Ile504Ile		ycf1	hypothetical chloroplast RF19
		131952	snp	G	C	C:20 G:0	CDS	-	1416/5325	472/1774	synonymous_variant c.1416C>G p.Leu472Leu		ycf1	hypothetical chloroplast RF19
		131969	snp	G	T	T:20 G:0	CDS	-	1399/5325	467/1774	missense_variant c.1399C>A p.Leu467Ile		ycf1	hypothetical chloroplast RF19
		132080	snp	G	T	T:20 G:0	CDS	-	1288/5325	430/1774	missense_variant c.1288C>A p.Leu430Ile		ycf1	hypothetical chloroplast RF19
		132235	snp	A	C	C:15 A:0	CDS	-	1133/5325	378/1774	missense_variant c.1133T>G p.Leu378Arg		ycf1	hypothetical chloroplast RF19
		132315	snp	G	T	T:11 G:0	CDS	-	1053/5325	351/1774	missense_variant c.1053C>A p.Phe351Leu		ycf1	hypothetical chloroplast RF19
Section 4 SNPs and INDEL detected between Xylocarpus moluccensis and Xylocarpus granatum
Reference	Qurey	POS	TYPE	REF	ALT	EVIDENCE	FTYPE	STRAND	NT_POS	AA_POS	EFFECT	LOCUS_TAG	GENE	PRODUCT
Xylocarpus moluccensis [MH330688.1]	Xylocarpus granatum [MH348155.1]	202	snp	A	C	C:18 A:0
		209	snp	C	A	A:18 C:0
		235	snp	T	A	A:20 T:0
		241	del	TTCATA	T	T:18 TTCATA:0
		253	snp	A	T	T:19 A:0
		281	snp	C	A	A:20 C:0
		327	snp	G	T	T:20 G:0
		348	snp	T	G	G:20 T:0
		387	snp	A	G	G:20 A:0
		401	ins	T	TA	TA:20 T:0
		427	snp	A	T	T:20 A:0
		528	snp	A	C	C:20 A:0
		878	snp	G	A	A:20 G:0	CDS	-	717/1062	239/353	synonymous_variant c.717C>T p.Phe239Phe		psbA	photosystem II protein D1
		1620	snp	T	G	G:20 T:0
		1690	snp	T	C	C:20 T:0
		2016	del	CTCTTCTT	C	C:19 CTCTTCTT:0
		2072	snp	C	T	T:20 C:0
		2171	snp	A	C	C:20 A:0
		2182	snp	G	A	A:20 G:0
		2265	snp	C	A	A:20 C:0	CDS	-	1449/1518	483/505	synonymous_variant c.1449G>T p.Arg483Arg		matK	maturase K
		2405	snp	C	G	G:20 C:0	CDS	-	1309/1518	437/505	missense_variant c.1309G>C p.Val437Leu		matK	maturase K
		2699	complex	TTC	ATT	ATT:19 TTC:0	CDS	-	1015/1518	338/505	missense_variant c.1013_1015delGAAinsAAT p.ArgIle338GlnLeu		matK	maturase K
		2709	snp	A	G	G:20 A:0	CDS	-	1005/1518	335/505	synonymous_variant c.1005T>C p.Ser335Ser		matK	maturase K
		2718	snp	T	G	G:20 T:0	CDS	-	996/1518	332/505	synonymous_variant c.996A>C p.Gly332Gly		matK	maturase K
		2730	snp	A	G	G:20 A:0	CDS	-	984/1518	328/505	synonymous_variant c.984T>C p.Ile328Ile		matK	maturase K
		2924	snp	T	C	C:20 T:0	CDS	-	790/1518	264/505	missense_variant c.790A>G p.Asn264Asp		matK	maturase K
		2933	snp	A	C	C:20 A:0	CDS	-	781/1518	261/505	missense_variant c.781T>G p.Tyr261Asp		matK	maturase K
		3176	snp	A	G	G:20 A:0	CDS	-	538/1518	180/505	missense_variant c.538T>C p.Phe180Leu		matK	maturase K
		3237	snp	G	A	A:20 G:0	CDS	-	477/1518	159/505	synonymous_variant c.477C>T p.Ile159Ile		matK	maturase K
		3716	snp	T	G	G:20 T:0
		3967	snp	C	A	A:20 C:0
		4005	snp	A	C	C:20 A:0
		4394	snp	C	T	T:20 C:0
		4851	del	AATATCCTC	A	A:18 AATATCCTC:0
		4883	complex	ATAT	TCTA	TCTA:18 ATAT:0
		4918	snp	G	T	T:20 G:0
		5176	snp	A	C	C:20 A:0
		5266	del	AG	A	A:19 AG:0
		5579	del	AT	A	A:19 AT:0
		5732	ins	C	CTTTCTT	CTTTCTT:17 C:0
		6054	snp	G	T	T:20 G:0
		6145	snp	T	C	C:20 T:0
		6266	snp	T	G	G:20 T:0
		6567	ins	C	CT	CT:18 C:0
		6636	snp	C	A	A:20 C:0
		6717	snp	G	T	T:20 G:0
		6923	snp	A	T	T:20 A:0
		7043	del	TAA	T	T:19 TAA:0
		7175	snp	A	C	C:20 A:0
		7311	snp	A	C	C:20 A:0
		7462	ins	A	ATT	ATT:18 A:0
		7537	snp	G	T	T:20 G:0
		7589	snp	C	G	G:20 C:0
		7799	snp	T	G	G:20 T:0
		8007	snp	T	C	C:20 T:0
		8209	ins	A	AT	AT:19 A:0
		8385	snp	C	G	G:20 C:0	CDS	+	71/186	24/61	missense_variant c.71C>G p.Ala24Gly		psbK	photosystem II protein K
		8447	snp	A	G	G:20 A:0	CDS	+	133/186	45/61	missense_variant c.133A>G p.Ile45Val		psbK	photosystem II protein K
		8631	snp	T	G	G:20 T:0
		9101	snp	A	C	C:20 A:0
		9213	ins	G	GAA	GAA:15 G:0
		9294	snp	T	G	G:17 T:0
		9319	snp	G	T	T:15 G:0
		9324	ins	T	TACTATATTATTTTAGTATATTA	TACTATATTATTTTAGTATATTA:12 T:0
		9470	del	TATTC	T	T:16 TATTC:0
		9573	del	GAA	G	G:18 GAA:0
		9763	snp	G	C	C:20 G:0
		9976	del	CT	C	C:19 CT:0
		10238	del	AT	A	A:19 AT:0
		10359	snp	A	G	G:20 A:0
		10547	snp	G	A	A:20 G:0
		10632	del	CGTCTTAG	C	C:17 CGTCTTAG:0
		11065	snp	C	T	T:20 C:0
		11216	snp	C	A	A:20 C:0	CDS	-	1380/1521	460/506	missense_variant c.1380G>T p.Glu460Asp		atpA	ATP synthase CF1 alpha subunit
		11948	snp	C	A	A:20 C:0	CDS	-	648/1521	216/506	missense_variant c.648G>T p.Arg216Ser		atpA	ATP synthase CF1 alpha subunit
		12649	snp	T	G	G:20 T:0
		13197	ins	C	CT	CT:19 C:0
		13502	ins	G	GA	GA:18 G:0
		13708	snp	G	A	A:20 G:0
		13763	ins	G	GAAA	GAAA:18 G:0
		14002	snp	G	T	T:20 G:0
		14008	ins	C	CT	CT:19 C:0
		14039	snp	C	A	A:20 C:0
		14085	del	GT	G	G:18 GT:0
		14486	snp	T	G	G:20 T:0	CDS	-	201/246	67/81	synonymous_variant c.201A>C p.Gly67Gly		atpH	ATP synthase CF0 subunit III
		16492	snp	A	G	G:20 A:0	CDS	-	135/744	45/247	synonymous_variant c.135T>C p.Val45Val		atpI	ATP synthase CF0 subunit IV
		16886	snp	A	G	G:20 A:0	CDS	-	700/702	234/233	stop_lost&splice_region_variant c.700T>C p.Ter234Argext*?		rps2	ribosomal protein S2
		16988	snp	C	A	A:20 C:0	CDS	-	598/702	200/233	missense_variant c.598G>T p.Ala200Ser		rps2	ribosomal protein S2
		17186	snp	T	G	G:20 T:0	CDS	-	400/702	134/233	missense_variant c.400A>C p.Thr134Pro		rps2	ribosomal protein S2
		17195	snp	T	G	G:20 T:0	CDS	-	391/702	131/233	missense_variant c.391A>C p.Ser131Arg		rps2	ribosomal protein S2
		17316	snp	C	G	G:20 C:0	CDS	-	270/702	90/233	missense_variant c.270G>C p.Arg90Ser		rps2	ribosomal protein S2
		17492	snp	T	C	C:20 T:0	CDS	-	94/702	32/233	missense_variant c.94A>G p.Thr32Ala		rps2	ribosomal protein S2
		17556	snp	C	A	A:20 C:0	CDS	-	30/702	10/233	missense_variant c.30G>T p.Leu10Phe		rps2	ribosomal protein S2
		17599	snp	C	A	A:20 C:0
		17937	snp	C	A	A:20 C:0	CDS	-	4041/4194	1347/1397	missense_variant c.4041G>T p.Gln1347His		rpoC2	RNA polymerase beta'' subunit
		18160	snp	G	C	C:20 G:0	CDS	-	3818/4194	1273/1397	missense_variant c.3818C>G p.Thr1273Arg		rpoC2	RNA polymerase beta'' subunit
		18480	snp	C	T	T:20 C:0	CDS	-	3498/4194	1166/1397	synonymous_variant c.3498G>A p.Ser1166Ser		rpoC2	RNA polymerase beta'' subunit
		18722	snp	G	C	C:20 G:0	CDS	-	3256/4194	1086/1397	missense_variant c.3256C>G p.Leu1086Val		rpoC2	RNA polymerase beta'' subunit
		18896	snp	T	G	G:20 T:0	CDS	-	3082/4194	1028/1397	missense_variant c.3082A>C p.Thr1028Pro		rpoC2	RNA polymerase beta'' subunit
		18992	snp	A	C	C:20 A:0	CDS	-	2986/4194	996/1397	missense_variant c.2986T>G p.Phe996Val		rpoC2	RNA polymerase beta'' subunit
		19049	snp	G	T	T:20 G:0	CDS	-	2929/4194	977/1397	missense_variant c.2929C>A p.Gln977Lys		rpoC2	RNA polymerase beta'' subunit
		19556	snp	G	A	A:20 G:0	CDS	-	2422/4194	808/1397	synonymous_variant c.2422C>T p.Leu808Leu		rpoC2	RNA polymerase beta'' subunit
		20057	snp	A	C	C:20 A:0	CDS	-	1921/4194	641/1397	missense_variant c.1921T>G p.Ser641Ala		rpoC2	RNA polymerase beta'' subunit
		20231	snp	A	G	G:20 A:0	CDS	-	1747/4194	583/1397	missense_variant c.1747T>C p.Phe583Leu		rpoC2	RNA polymerase beta'' subunit
		20242	snp	T	C	C:20 T:0	CDS	-	1736/4194	579/1397	missense_variant c.1736A>G p.Lys579Arg		rpoC2	RNA polymerase beta'' subunit
		20898	snp	G	T	T:20 G:0	CDS	-	1080/4194	360/1397	synonymous_variant c.1080C>A p.Ile360Ile		rpoC2	RNA polymerase beta'' subunit
		21612	snp	A	G	G:20 A:0	CDS	-	366/4194	122/1397	synonymous_variant c.366T>C p.Thr122Thr		rpoC2	RNA polymerase beta'' subunit
		22079	snp	A	C	C:20 A:0
		23093	snp	G	A	A:20 G:0	CDS	-	1141/2073	381/690	synonymous_variant c.1141C>T p.Leu381Leu		rpoC1	RNA polymerase beta' subunit
		23524	del	GGTC	G	G:19 GGTC:0	CDS	-	709/2073	236/690	disruptive_inframe_deletion c.707_709delGAC p.Gly236_Pro237delinsAla		rpoC1	RNA polymerase beta' subunit
		23851	snp	C	G	G:13 C:0
		23879	snp	C	T	T:13 C:0
		24429	snp	C	A	A:20 C:0
		25283	complex	GG	TT	TT:19 GG:0	CDS	-	2929/3213	976/1070	synonymous_variant c.2928_2929delCCinsAA p.978		rpoB	RNA polymerase beta subunit
		26866	snp	G	A	A:20 G:0	CDS	-	1346/3213	449/1070	missense_variant c.1346C>T p.Ser449Phe		rpoB	RNA polymerase beta subunit
		27237	snp	G	A	A:20 G:0	CDS	-	975/3213	325/1070	synonymous_variant c.975C>T p.Phe325Phe		rpoB	RNA polymerase beta subunit
		28230	snp	C	A	A:20 C:0
		28798	snp	A	T	T:20 A:0
		28853	ins	A	AT	AT:18 A:0
		28903	snp	G	T	T:20 G:0
		28956	snp	A	G	G:20 A:0
		29122	ins	C	CAAA	CAAA:18 C:0
		29711	snp	C	G	G:20 C:0
		29852	snp	A	G	G:20 A:0
		29871	snp	A	C	C:20 A:0
		29931	snp	C	G	G:20 C:0
		30189	del	CT	C	C:19 CT:0
		30230	del	TTATTAATTA	T	T:18 TTATTAATTA:0
		30310	snp	T	G	G:20 T:0
		30904	snp	A	C	C:20 A:0
		31143	snp	C	T	T:20 C:0
		31191	del	AT	A	A:19 AT:0
		31843	snp	G	T	T:20 G:0
		31893	ins	A	ATT	ATT:18 A:0
		32214	ins	G	GA	GA:19 G:0
		32754	snp	T	C	C:19 T:0
		32935	snp	C	A	A:18 C:0
		32946	complex	AAAGGAC	T	T:17 AAAGGAC:0
		32973	snp	G	T	T:19 G:0
		32981	snp	G	A	A:19 G:0
		33154	snp	G	T	T:19 G:0
		34097	snp	T	C	C:20 T:0
		34128	snp	G	C	C:20 G:0
		34143	snp	C	T	T:20 C:0
		34422	snp	A	T	T:20 A:0
		34594	ins	C	CA	CA:19 C:0
		37471	complex	TCCTCCC	GGGAGGA	GGGAGGA:16 TCCTCCC:0
		37517	snp	T	C	C:19 T:0
		37527	del	CA	C	C:18 CA:0
		37772	snp	T	G	G:20 T:0
		37814	del	TA	T	T:18 TA:0
		37865	snp	G	T	T:20 G:0
		37937	snp	A	C	C:20 A:0
		37995	snp	C	G	G:20 C:0
		38265	del	TA	T	T:19 TA:0
		38475	snp	A	C	C:12 A:0
		38725	snp	C	T	T:12 C:0	tRNA	+			non_coding_transcript_variant		trnG-UCC	tRNA-Gly
		38927	snp	C	T	T:20 C:0
		39173	snp	T	G	G:20 T:0
		39282	snp	T	C	C:20 T:0	CDS	-	207/303	69/100	synonymous_variant c.207A>G p.Pro69Pro		rps14	ribosomal protein S14
		39355	snp	A	C	C:20 A:0	CDS	-	134/303	45/100	missense_variant c.134T>G p.Val45Gly		rps14	ribosomal protein S14
		40556	snp	C	G	G:20 C:0	CDS	-	1281/2205	427/734	synonymous_variant c.1281G>C p.Leu427Leu		psaB	photosystem I P700 apoprotein A2
		41297	snp	T	C	C:20 T:0	CDS	-	540/2205	180/734	synonymous_variant c.540A>G p.Ser180Ser		psaB	photosystem I P700 apoprotein A2
		44408	snp	A	T	T:20 A:0
		44582	snp	C	G	G:20 C:0
		45008	snp	A	C	C:20 A:0
		45131	snp	G	T	T:20 G:0
		45651	snp	T	C	C:16 T:0
		45659	del	CCCCCCCCTTTTTTTTTCTTTTACTTT	C	C:14 CCCCCCCCTTTTTTTTTCTTTTACTTT:0
		46062	snp	T	G	G:20 T:0
		46201	snp	A	C	C:20 A:0
		46403	snp	C	A	A:20 C:0
		46416	complex	TG	GC	GC:19 TG:0
		46653	snp	A	G	G:20 A:0
		47193	snp	G	C	C:20 G:0
		47478	complex	GA	TC	TC:19 GA:0
		47577	snp	A	C	C:20 A:0
		47588	snp	G	A	A:20 G:0
		47837	snp	A	C	C:20 A:0
		47924	snp	A	C	C:20 A:0
		48236	snp	G	T	T:20 G:0	CDS	-	437/606	146/201	missense_variant c.437C>A p.Ala146Asp		rps4	ribosomal protein S4
		48314	snp	C	T	T:20 C:0	CDS	-	359/606	120/201	missense_variant c.359G>A p.Gly120Asp		rps4	ribosomal protein S4
		48382	snp	C	T	T:20 C:0	CDS	-	291/606	97/201	synonymous_variant c.291G>A p.Arg97Arg		rps4	ribosomal protein S4
		48843	del	TA	T	T:19 TA:0
		48988	del	CT	C	C:19 CT:0
		49226	snp	A	T	T:20 A:0
		49320	snp	C	T	T:20 C:0
		49356	del	ATT	A	A:18 ATT:0
		49404	snp	A	C	C:20 A:0
		49730	snp	C	A	A:20 C:0
		50325	ins	C	CT	CT:18 C:0
		50448	ins	C	CA	CA:20 C:0
		50517	snp	A	G	G:20 A:0
		50963	complex	TCTTA	CCTTC	CCTTC:19 TCTTA:0
		51186	snp	A	C	C:20 A:0
		51549	snp	G	T	T:20 G:0
		52880	del	AT	A	A:17 AT:0
		53638	snp	T	G	G:20 T:0
		53857	ins	C	CAAAGA	CAAAGA:18 C:0
		54012	del	TG	T	T:19 TG:0
		54100	snp	G	T	T:20 G:0
		54149	snp	T	G	G:20 T:0
		55194	snp	T	G	G:20 T:0
		55739	snp	C	T	T:20 C:0	CDS	-	40/402	14/133	missense_variant c.40G>A p.Val14Ile		atpE	ATP synthase CF1 epsilon subunit
		55923	snp	T	C	C:20 T:0	CDS	-	1349/1497	450/498	missense_variant c.1349A>G p.Asp450Gly		atpB	ATP synthase CF1 beta subunit
		55945	snp	C	T	T:20 C:0	CDS	-	1327/1497	443/498	missense_variant c.1327G>A p.Gly443Ser		atpB	ATP synthase CF1 beta subunit
		56134	snp	G	C	C:20 G:0	CDS	-	1138/1497	380/498	missense_variant c.1138C>G p.Leu380Val		atpB	ATP synthase CF1 beta subunit
		56899	snp	T	C	C:20 T:0	CDS	-	373/1497	125/498	missense_variant c.373A>G p.Asn125Asp		atpB	ATP synthase CF1 beta subunit
		57295	ins	A	ATTT	ATTT:18 A:0
		57514	snp	T	G	G:20 T:0
		57787	del	GAA	G	G:18 GAA:0
		57944	del	AT	A	A:20 AT:0
		59611	snp	C	T	T:20 C:0
		59653	snp	C	G	G:20 C:0
		59892	snp	C	A	A:20 C:0
		60245	snp	C	A	A:20 C:0	CDS	+	267/1548	89/515	missense_variant c.267C>A p.Asp89Glu		accD	acetyl-CoA carboxylase beta subunit
		60278	snp	C	A	A:20 C:0	CDS	+	300/1548	100/515	missense_variant c.300C>A p.Asn100Lys		accD	acetyl-CoA carboxylase beta subunit
		60821	snp	T	G	G:15 T:0	CDS	+	843/1548	281/515	missense_variant c.843T>G p.Phe281Leu		accD	acetyl-CoA carboxylase beta subunit
		60829	snp	T	G	G:15 T:0	CDS	+	851/1548	284/515	missense_variant c.851T>G p.Ile284Ser		accD	acetyl-CoA carboxylase beta subunit
		61023	snp	C	T	T:20 C:0	CDS	+	1045/1548	349/515	missense_variant c.1045C>T p.Leu349Phe		accD	acetyl-CoA carboxylase beta subunit
		61382	snp	A	G	G:20 A:0	CDS	+	1404/1548	468/515	synonymous_variant c.1404A>G p.Lys468Lys		accD	acetyl-CoA carboxylase beta subunit
		61425	snp	G	C	C:20 G:0	CDS	+	1447/1548	483/515	missense_variant c.1447G>C p.Asp483His		accD	acetyl-CoA carboxylase beta subunit
		61674	del	AT	A	A:18 AT:0
		61873	snp	A	C	C:20 A:0
		61880	snp	A	C	C:20 A:0
		61904	snp	T	C	C:20 T:0
		61950	ins	T	TTA	TTA:18 T:0
		62395	snp	A	C	C:20 A:0
		62705	snp	T	C	C:20 T:0
		62769	snp	C	A	A:20 C:0
		62960	snp	T	A	A:20 T:0	CDS	+	174/555	58/184	missense_variant c.174T>A p.Asn58Lys		ycf4	photosystem I assembly protein ycf4
		63008	snp	C	A	A:20 C:0	CDS	+	222/555	74/184	synonymous_variant c.222C>A p.Leu74Leu		ycf4	photosystem I assembly protein ycf4
		63503	del	TTTTTTTGTCTACAAAAAAATTG	T	T:16 TTTTTTTGTCTACAAAAAAATTG:0
		64618	snp	C	G	G:20 C:0	CDS	+	339/699	113/232	missense_variant c.339C>G p.Phe113Leu		cemA	envelope membrane protein
		64682	snp	G	C	C:20 G:0	CDS	+	403/699	135/232	missense_variant c.403G>C p.Val135Leu		cemA	envelope membrane protein
		64819	snp	A	C	C:20 A:0	CDS	+	540/699	180/232	synonymous_variant c.540A>C p.Val180Val		cemA	envelope membrane protein
		64838	snp	T	G	G:20 T:0	CDS	+	559/699	187/232	missense_variant c.559T>G p.Ser187Ala		cemA	envelope membrane protein
		64988	snp	A	C	C:20 A:0
		66355	snp	T	G	G:20 T:0
		66516	snp	T	C	C:20 T:0
		66536	ins	A	AG	AG:20 A:0
		66684	snp	G	T	T:20 G:0
		66735	del	TA	T	T:19 TA:0
		66925	snp	G	T	T:20 G:0
		67380	snp	C	A	A:20 C:0
		68322	del	TAGAAA	T	T:18 TAGAAA:0
		68559	ins	C	CT	CT:19 C:0
		68706	snp	A	C	C:20 A:0
		68967	ins	T	TA	TA:18 T:0
		69718	ins	C	CTTTCT	CTTTCT:18 C:0
		69939	ins	C	CGTT	CGTT:18 C:0
		70041	snp	C	G	G:20 C:0
		70097	snp	T	C	C:20 T:0	tRNA	-			non_coding_transcript_variant		trnP-UGG	tRNA-Pro
		70411	snp	C	A	A:20 C:0
		70712	del	CT	C	C:18 CT:0
		70927	snp	G	T	T:20 G:0
		70944	snp	A	C	C:20 A:0
		71147	snp	C	G	G:20 C:0	CDS	+	63/201	21/66	missense_variant c.63C>G p.Asn21Lys		rpl33	ribosomal protein L33
		71439	snp	G	A	A:20 G:0
		71600	snp	A	T	T:20 A:0	CDS	+	118/306	40/101	missense_variant c.118A>T p.Ile40Phe		rps18	ribosomal protein S18
		71891	ins	C	CTTT	CTTT:18 C:0
		72386	snp	C	A	A:20 C:0
		73009	snp	T	G	G:20 T:0
		73233	snp	G	T	T:20 G:0	CDS	.	277/369	93/122	missense_variant c.277C>A p.Leu93Ile		rps12	ribosomal protein S12
		73452	snp	C	G	G:20 C:0	CDS	-	542/588	181/195	missense_variant c.542G>C p.Arg181Thr		clpP	ATP-dependent Clp protease proteolytic subunit
		73870	ins	C	CT	CT:19 C:0
		73962	del	GT	G	G:18 GT:0
		74325	snp	T	G	G:20 T:0	CDS	-	329/588	110/195	missense_variant c.329A>C p.Lys110Thr		clpP	ATP-dependent Clp protease proteolytic subunit
		74369	snp	G	A	A:20 G:0	CDS	-	285/588	95/195	synonymous_variant c.285C>T p.Tyr95Tyr		clpP	ATP-dependent Clp protease proteolytic subunit
		74408	snp	G	C	C:20 G:0	CDS	-	246/588	82/195	stop_gained c.246C>G p.Tyr82*		clpP	ATP-dependent Clp protease proteolytic subunit
		74530	snp	A	C	C:20 A:0	CDS	-	124/588	42/195	missense_variant c.124T>G p.Tyr42Asp		clpP	ATP-dependent Clp protease proteolytic subunit
		74661	ins	G	GA	GA:18 G:0
		74940	snp	C	G	G:20 C:0
		75014	del	CT	C	C:17 CT:0
		75467	complex	TGGGATTTTT	CGTGACTTCG	CGTGACTTCG:18 TGGGATTTTT:0	CDS	-	40/588	11/195	missense_variant c.31_40delAAAAATCCCAinsCGAAGTCACG p.LysAsnProArg11ArgSerHisGly		clpP	ATP-dependent Clp protease proteolytic subunit
		75591	snp	G	T	T:19 G:0
		75599	ins	C	CATA	CATA:18 C:0
		75670	snp	G	C	C:19 G:0
		75860	ins	A	AAAG	AAAG:18 A:0
		75919	snp	G	C	C:20 G:0
		76229	snp	G	C	C:20 G:0	CDS	+	291/1527	97/508	synonymous_variant c.291G>C p.Ala97Ala		psbB	photosystem II CP47 chlorophyll apoprotein
		77568	complex	GATTCTT	TGATTC	TGATTC:18 GATTCTT:0
		78282	del	CACA	C	C:18 CACA:0
		78334	ins	A	AT	AT:18 A:0
		78462	snp	A	G	G:20 A:0
		78773	del	GGACTT	G	G:19 GGACTT:0
		78987	snp	C	A	A:20 C:0
		79107	snp	G	C	C:20 G:0
		79121	snp	G	C	C:20 G:0
		79512	snp	G	A	A:20 G:0	CDS	+	297/648	99/215	synonymous_variant c.297G>A p.Leu99Leu		petB	cytochrome b6
		79563	snp	G	A	A:20 G:0	CDS	+	348/648	116/215	synonymous_variant c.348G>A p.Leu116Leu		petB	cytochrome b6
		79620	snp	C	T	T:20 C:0	CDS	+	405/648	135/215	synonymous_variant c.405C>T p.Gly135Gly		petB	cytochrome b6
		79674	snp	T	C	C:20 T:0	CDS	+	459/648	153/215	synonymous_variant c.459T>C p.Gly153Gly		petB	cytochrome b6
		79873	snp	C	G	G:20 C:0
		79914	snp	G	T	T:20 G:0
		79987	snp	G	T	T:20 G:0
		80194	ins	T	TGGTTC	TGGTTC:18 T:1
		80688	ins	C	CT	CT:19 C:0
		81428	del	AT	A	A:18 AT:0
		81876	snp	G	T	T:20 G:0	CDS	-	638/984	213/327	missense_variant c.638C>A p.Ala213Glu		rpoA	RNA polymerase alpha subunit
		81975	snp	A	C	C:20 A:0	CDS	-	539/984	180/327	missense_variant c.539T>G p.Leu180Arg		rpoA	RNA polymerase alpha subunit
		82060	snp	C	G	G:20 C:0	CDS	-	454/984	152/327	missense_variant c.454G>C p.Glu152Gln		rpoA	RNA polymerase alpha subunit
		82196	snp	T	C	C:20 T:0	CDS	-	318/984	106/327	synonymous_variant c.318A>G p.Ala106Ala		rpoA	RNA polymerase alpha subunit
		82753	snp	C	T	T:19 C:0	CDS	-	242/417	81/138	missense_variant c.242G>A p.Arg81Gln		rps11	ribosomal protein S11
		82895	snp	C	T	T:19 C:0	CDS	-	100/417	34/138	missense_variant c.100G>A p.Ala34Thr		rps11	ribosomal protein S11
		82948	complex	ATCC	CCCT	CCCT:18 ATCC:0	CDS	-	47/417	15/138	missense_variant c.44_47delGGATinsAGGG p.ArgIle15GlnGly		rps11	ribosomal protein S11
		82957	snp	T	G	G:19 T:0	CDS	-	38/417	13/138	missense_variant c.38A>C p.Asn13Thr		rps11	ribosomal protein S11
		82963	snp	C	T	T:20 C:0	CDS	-	32/417	11/138	missense_variant c.32G>A p.Arg11His		rps11	ribosomal protein S11
		83007	ins	C	CATAAAT	CATAAAT:18 C:0
		83282	snp	G	C	C:20 G:0
		83340	snp	G	C	C:20 G:0
		83641	snp	A	G	G:20 A:0
		83656	complex	GAT	TA	TA:18 GAT:0
		83911	snp	G	C	C:20 G:0	CDS	-	207/405	69/134	missense_variant c.207C>G p.Ser69Arg		rps8	ribosomal protein S8
		84169	del	CT	C	C:19 CT:0
		84251	snp	C	A	A:20 C:0
		84560	snp	C	G	G:20 C:0	CDS	-	89/369	30/122	missense_variant c.89G>C p.Arg30Pro		rpl14	ribosomal protein L14
		84597	snp	C	T	T:20 C:0	CDS	-	52/369	18/122	missense_variant c.52G>A p.Glu18Lys		rpl14	ribosomal protein L14
		84710	ins	C	CAA	CAA:18 C:0
		84925	snp	T	C	C:20 T:0	CDS	-	264/411	88/136	synonymous_variant c.264A>G p.Lys88Lys		rpl16	ribosomal protein L16
		85335	ins	G	GTT	GTT:19 G:0
		85368	del	TG	T	T:20 TG:0
		85548	snp	G	T	T:20 G:0
		86565	snp	G	T	T:20 G:0	CDS	-	353/660	118/219	missense_variant c.353C>A p.Ala118Glu		rps3	ribosomal protein S3
		86959	complex	GTTCTTA	ACTCCAT	ACTCCAT:13 GTTCTTA:1	CDS	-	579/636	191/211	missense_variant c.573_579delTAAGAACinsATGGAGT p.LysAsn192TrpSer		rpl22	ribosomal protein L22
		87130	snp	T	C	C:12 T:0	CDS	-	408/636	136/211	synonymous_variant c.408A>G p.Lys136Lys		rpl22	ribosomal protein L22
		87143	snp	C	A	A:13 C:0	CDS	-	395/636	132/211	missense_variant c.395G>T p.Arg132Ile		rpl22	ribosomal protein L22
		87159	snp	C	T	T:14 C:0	CDS	-	379/636	127/211	missense_variant c.379G>A p.Gly127Ser		rpl22	ribosomal protein L22
		87233	snp	A	G	G:18 A:0	CDS	-	305/636	102/211	missense_variant c.305T>C p.Ile102Thr		rpl22	ribosomal protein L22
		87279	snp	C	G	G:19 C:0	CDS	-	259/636	87/211	missense_variant c.259G>C p.Ala87Pro		rpl22	ribosomal protein L22
		87328	snp	A	G	G:17 A:0	repeat_region	+	210/636	70/211	synonymous_variant c.210T>C p.Phe70Phe
		114321	ins	T	TAACAAG	TAACAAG:15 T:0	CDS	-	1087/1137	363/378	conservative_inframe_insertion c.1086_1087insACAAGA p.Leu362_Leu363insThrArg		ndhF	NADH-plastoquinone oxidoreductase subunit 5
		114329	snp	C	G	G:16 C:0	CDS	-	1093/1137	365/378	missense_variant c.1093C>G p.Gln365Glu		ndhF	NADH-plastoquinone oxidoreductase subunit 5
		114439	snp	C	T	T:20 C:0	CDS	-	2097/2223	699/740	synonymous_variant c.2097G>A p.Gly699Gly		ndhF	NADH-plastoquinone oxidoreductase subunit 5
		114517	snp	A	G	G:20 A:0	CDS	-	2019/2223	673/740	synonymous_variant c.2019T>C p.Ser673Ser		ndhF	NADH-plastoquinone oxidoreductase subunit 5
		114534	snp	A	C	C:20 A:0	CDS	-	2002/2223	668/740	missense_variant c.2002T>G p.Ser668Ala		ndhF	NADH-plastoquinone oxidoreductase subunit 5
		114570	snp	T	G	G:20 T:0	CDS	-	1966/2223	656/740	missense_variant c.1966A>C p.Ile656Leu		ndhF	NADH-plastoquinone oxidoreductase subunit 5
		114577	snp	G	T	T:20 G:0	CDS	-	1959/2223	653/740	synonymous_variant c.1959C>A p.Ile653Ile		ndhF	NADH-plastoquinone oxidoreductase subunit 5
		114828	snp	C	T	T:20 C:0	CDS	-	1708/2223	570/740	missense_variant c.1708G>A p.Glu570Lys		ndhF	NADH-plastoquinone oxidoreductase subunit 5
		114939	snp	T	G	G:20 T:0	CDS	-	1597/2223	533/740	missense_variant c.1597A>C p.Thr533Pro		ndhF	NADH-plastoquinone oxidoreductase subunit 5
		115249	snp	T	C	C:20 T:0	CDS	-	1287/2223	429/740	synonymous_variant c.1287A>G p.Pro429Pro		ndhF	NADH-plastoquinone oxidoreductase subunit 5
		116476	snp	C	A	A:20 C:0	CDS	-	60/2223	20/740	missense_variant c.60G>T p.Met20Ile		ndhF	NADH-plastoquinone oxidoreductase subunit 5
		116613	del	TAA	T	T:19 TAA:0
		116995	del	AT	A	A:20 AT:0
		117038	complex	GAG	TAGAA	TAGAA:18 GAG:0
		117146	snp	G	T	T:20 G:0
		117207	snp	C	T	T:20 C:0
		117482	snp	T	A	A:20 T:0
		117520	ins	C	CT	CT:19 C:0
		117604	snp	G	T	T:20 G:0	CDS	+	71/159	24/52	missense_variant c.71G>T p.Gly24Val		rpl32	ribosomal protein L32
		117612	snp	A	G	G:20 A:0	CDS	+	79/159	27/52	missense_variant c.79A>G p.Thr27Ala		rpl32	ribosomal protein L32
		117636	snp	G	T	T:20 G:0	CDS	+	103/159	35/52	missense_variant c.103G>T p.Ala35Ser		rpl32	ribosomal protein L32
		117690	del	TAAGAA	T	T:18 TAAGAA:0	CDS	+	158/159	53/52	frameshift_variant&stop_lost&splice_region_variant c.158_*3delAAGAA p.Ter53fs		rpl32	ribosomal protein L32
		117732	snp	A	G	G:16 A:0
		118042	snp	T	G	G:14 T:0
		118086	snp	A	G	G:17 A:0
		118100	complex	AA	TT	TT:18 AA:0
		118168	del	GA	G	G:19 GA:0
		118323	snp	G	T	T:20 G:0
		118341	snp	T	G	G:20 T:0
		118357	snp	T	G	G:20 T:0
		118399	snp	A	T	T:20 A:0
		118620	complex	GGGT	AGGG	AGGG:19 GGGT:0
		118637	del	ATT	A	A:18 ATT:0
		119183	snp	A	T	T:20 A:0	CDS	+	531/960	177/319	missense_variant c.531A>T p.Lys177Asn		ccsA	cytochrome cheme attachment protein
		119498	snp	T	G	G:20 T:0	CDS	+	846/960	282/319	missense_variant c.846T>G p.Phe282Leu		ccsA	cytochrome cheme attachment protein
		119523	snp	T	G	G:20 T:0	CDS	+	871/960	291/319	missense_variant c.871T>G p.Ser291Ala		ccsA	cytochrome cheme attachment protein
		119694	del	AACCTTTTGAATCACCAC	A	A:16 AACCTTTTGAATCACCAC:0
		119899	ins	A	ATT	ATT:17 A:0
		120537	snp	G	A	A:20 G:0	CDS	-	918/1530	306/509	synonymous_variant c.918C>T p.Gly306Gly		ndhD	NADH-plastoquinone oxidoreductase subunit 4
		121074	snp	T	C	C:20 T:0	CDS	-	381/1530	127/509	missense_variant c.381A>G p.Ile127Met		ndhD	NADH-plastoquinone oxidoreductase subunit 4
		121319	snp	T	A	A:20 T:0	CDS	-	136/1530	46/509	missense_variant c.136A>T p.Ile46Leu		ndhD	NADH-plastoquinone oxidoreductase subunit 4
		121567	ins	T	TG	TG:19 T:0
		121819	snp	C	T	T:20 C:0	CDS	-	18/246	6/81	synonymous_variant c.18G>A p.Lys6Lys		psaC	photosystem I subunit VII
		121931	ins	A	AT	AT:19 A:0
		122024	del	AT	A	A:20 AT:0
		122214	snp	G	T	T:20 G:0	CDS	-	163/306	55/101	synonymous_variant c.163C>A p.Arg55Arg		ndhE	NADH-plastoquinone oxidoreductase subunit 4L
		122579	snp	T	G	G:20 T:0
		123867	snp	A	G	G:20 A:0
		123988	snp	A	G	G:20 A:0	CDS	-	1047/1092	349/363	synonymous_variant c.1047T>C p.Leu349Leu		ndhA	NADH-plastoquinone oxidoreductase subunit 1
		124693	ins	T	TA	TA:19 T:0
		124739	snp	C	A	A:20 C:0
		125023	snp	C	A	A:20 C:0
		125219	del	AT	A	A:19 AT:0
		125649	snp	T	G	G:20 T:0	CDS	-	487/1092	163/363	synonymous_variant c.487A>C p.Arg163Arg		ndhA	NADH-plastoquinone oxidoreductase subunit 1
		126423	snp	T	C	C:20 T:0	CDS	-	896/1182	299/393	missense_variant c.896A>G p.Asn299Ser		ndhH	NADH-plastoquinone oxidoreductase subunit 7
		126429	snp	T	C	C:20 T:0	CDS	-	890/1182	297/393	missense_variant c.890A>G p.Lys297Arg		ndhH	NADH-plastoquinone oxidoreductase subunit 7
		127142	snp	A	T	T:20 A:0	CDS	-	177/1182	59/393	synonymous_variant c.177T>A p.Thr59Thr		ndhH	NADH-plastoquinone oxidoreductase subunit 7
		127329	snp	T	G	G:20 T:0
		127396	snp	A	C	C:20 A:0
		127409	snp	A	C	C:20 A:0
		127693	complex	CC	A	A:18 CC:0
		127711	snp	T	A	A:20 T:0
		127828	snp	C	T	T:20 C:0
		128049	snp	T	G	G:20 T:0	CDS	-	5356/5367	1786/1788	missense_variant c.5356A>C p.Lys1786Gln		ycf1	hypothetical chloroplast RF19
		128451	snp	C	G	G:20 C:0	CDS	-	4954/5367	1652/1788	missense_variant c.4954G>C p.Gly1652Arg		ycf1	hypothetical chloroplast RF19
		128456	snp	A	C	C:20 A:0	CDS	-	4949/5367	1650/1788	missense_variant c.4949T>G p.Ile1650Arg		ycf1	hypothetical chloroplast RF19
		128540	snp	G	A	A:20 G:0	CDS	-	4865/5367	1622/1788	missense_variant c.4865C>T p.Pro1622Leu		ycf1	hypothetical chloroplast RF19
		128588	snp	A	G	G:20 A:0	CDS	-	4817/5367	1606/1788	missense_variant c.4817T>C p.Ile1606Thr		ycf1	hypothetical chloroplast RF19
		129025	snp	G	C	C:20 G:0	CDS	-	4380/5367	1460/1788	missense_variant c.4380C>G p.Cys1460Trp		ycf1	hypothetical chloroplast RF19
		129394	snp	G	T	T:20 G:0	CDS	-	4011/5367	1337/1788	missense_variant c.4011C>A p.Ser1337Arg		ycf1	hypothetical chloroplast RF19
		129751	snp	A	G	G:20 A:0	CDS	-	3654/5367	1218/1788	synonymous_variant c.3654T>C p.Ser1218Ser		ycf1	hypothetical chloroplast RF19
		129829	snp	G	C	C:20 G:0	CDS	-	3576/5367	1192/1788	synonymous_variant c.3576C>G p.Ser1192Ser		ycf1	hypothetical chloroplast RF19
		129910	snp	T	A	A:20 T:0	CDS	-	3495/5367	1165/1788	missense_variant c.3495A>T p.Lys1165Asn		ycf1	hypothetical chloroplast RF19
		129943	complex	GTT	ATC	ATC:19 GTT:0	CDS	-	3462/5367	1154/1788	missense_variant c.3460_3462delAACinsGAT p.Asn1154Asp		ycf1	hypothetical chloroplast RF19
		129963	snp	C	A	A:20 C:0	CDS	-	3442/5367	1148/1788	missense_variant c.3442G>T p.Asp1148Tyr		ycf1	hypothetical chloroplast RF19
		130025	snp	A	G	G:20 A:0	CDS	-	3380/5367	1127/1788	missense_variant c.3380T>C p.Ile1127Thr		ycf1	hypothetical chloroplast RF19
		130112	snp	A	C	C:20 A:0	CDS	-	3293/5367	1098/1788	missense_variant c.3293T>G p.Ile1098Arg		ycf1	hypothetical chloroplast RF19
		130166	snp	A	T	T:20 A:0	CDS	-	3239/5367	1080/1788	missense_variant c.3239T>A p.Phe1080Tyr		ycf1	hypothetical chloroplast RF19
		130206	snp	T	G	G:20 T:0	CDS	-	3199/5367	1067/1788	missense_variant c.3199A>C p.Ile1067Leu		ycf1	hypothetical chloroplast RF19
		130230	snp	T	A	A:20 T:0	CDS	-	3175/5367	1059/1788	missense_variant c.3175A>T p.Thr1059Ser		ycf1	hypothetical chloroplast RF19
		130245	snp	T	G	G:20 T:0	CDS	-	3160/5367	1054/1788	missense_variant c.3160A>C p.Lys1054Gln		ycf1	hypothetical chloroplast RF19
		130252	snp	G	T	T:20 G:0	CDS	-	3153/5367	1051/1788	synonymous_variant c.3153C>A p.Ile1051Ile		ycf1	hypothetical chloroplast RF19
		130465	snp	A	C	C:20 A:0	CDS	-	2940/5367	980/1788	missense_variant c.2940T>G p.Ser980Arg		ycf1	hypothetical chloroplast RF19
		130533	snp	C	T	T:20 C:0	CDS	-	2872/5367	958/1788	missense_variant c.2872G>A p.Val958Ile		ycf1	hypothetical chloroplast RF19
		130641	snp	G	T	T:20 G:0	CDS	-	2764/5367	922/1788	missense_variant c.2764C>A p.Arg922Ser		ycf1	hypothetical chloroplast RF19
		130731	snp	A	G	G:20 A:0	CDS	-	2674/5367	892/1788	synonymous_variant c.2674T>C p.Leu892Leu		ycf1	hypothetical chloroplast RF19
		131191	snp	C	A	A:20 C:0	CDS	-	2214/5367	738/1788	synonymous_variant c.2214G>T p.Thr738Thr		ycf1	hypothetical chloroplast RF19
		131208	snp	A	C	C:20 A:0	CDS	-	2197/5367	733/1788	missense_variant c.2197T>G p.Tyr733Asp		ycf1	hypothetical chloroplast RF19
		131405	snp	T	G	G:20 T:0	CDS	-	2000/5367	667/1788	missense_variant c.2000A>C p.Lys667Thr		ycf1	hypothetical chloroplast RF19
		131722	snp	T	G	G:20 T:0	CDS	-	1683/5367	561/1788	missense_variant c.1683A>C p.Glu561Asp		ycf1	hypothetical chloroplast RF19
		131851	snp	G	T	T:20 G:0	CDS	-	1554/5367	518/1788	synonymous_variant c.1554C>A p.Ile518Ile		ycf1	hypothetical chloroplast RF19
		131947	snp	G	C	C:20 G:0	CDS	-	1458/5367	486/1788	synonymous_variant c.1458C>G p.Leu486Leu		ycf1	hypothetical chloroplast RF19
		131964	snp	G	T	T:20 G:0	CDS	-	1441/5367	481/1788	missense_variant c.1441C>A p.Leu481Ile		ycf1	hypothetical chloroplast RF19
		132075	snp	G	T	T:20 G:0	CDS	-	1330/5367	444/1788	missense_variant c.1330C>A p.Leu444Ile		ycf1	hypothetical chloroplast RF19
		132138	snp	T	C	C:20 T:0	CDS	-	1267/5367	423/1788	missense_variant c.1267A>G p.Thr423Ala		ycf1	hypothetical chloroplast RF19
		132230	snp	A	C	C:20 A:0	CDS	-	1175/5367	392/1788	missense_variant c.1175T>G p.Leu392Arg		ycf1	hypothetical chloroplast RF19
		132297	del	GTTTTTCAAC	G	G:14 GTTTTTCAAC:0	CDS	-	1107/5367	367/1788	conservative_inframe_deletion c.1099_1107delGTTGAAAAA p.Val367_Lys369del		ycf1	hypothetical chloroplast RF19
		132319	snp	G	T	T:14 G:0	CDS	-	1086/5367	362/1788	missense_variant c.1086C>A p.Phe362Leu		ycf1	hypothetical chloroplast RF19
