# Supplementary material for: Interspecific variation and phylogenetic relationship between mangrove and non-mangrove species of a same family (Meliaceae)—insights from comparative analysis of complete chloroplast genome
Source: PeerJ. 2023 Jun 26;11:e15527. doi: 10.7717/peerj.15527 (PMC10309054; doi:10.7717/peerj.15527)
Supplement: Supplemental Information 5 [file peerj-11-15527-s005.xlsx]

## Sheet: Sheet1
Table S5 Repeats (>= 30bp) identified in 5 Meliaceae species
X. granatum										X. moluccensis											X. rumphii											S. macrophylla											C. guianensis
No.	Repeat length(bp)	Position (1st)	Position	Repeat type	Repeat length(bp)	Position (2nd)	Distance of this repeat	e-value		Corresponding to the No. of repeats in X. granatum	No.	Repeat length(bp)	Position (1st)	Position	Repeat type	Repeat length(bp)	Position (2nd)	Distance of this repeat	e-value		Corresponding to the No. of repeats in X. granatum	No.	Repeat length(bp)	Position (1st)	Position	Repeat type	Repeat length(bp)	Position (2nd)	Distance of this repeat	e-value		Corresponding to the No. of repeats in X. granatum	No.	Repeat length(bp)	Position (1st)	Position	Repeat type	Repeat length(bp)	Position (2nd)	Distance of this repeat	e-value		Corresponding to the No. of repeats in X. granatum	No.	Repeat length(bp)	Position (1st)	Position	Repeat type	Repeat length(bp)
1	32	9103	trnS-GCU	F	32	37539	-3	3.58e-05		1	1	32	9116	trnS-GCU	F	32	37551	-3	3.57e-05		1	1	32	9112	trnS-GCU	F	32	37509	-3	3.57e-05		1	1	32	9067	trnS-GCU	F	32	37494	-3	3.57e-05		*	1	32	9298	psbI-trnS-GCU	F	32
2	30	9105	trnS-GCU	P	30	47733	-1	3.85e-07		2	2	30	9118	trnS-GCU	P	30	47736	-1	3.84e-07		2	2	30	9114	trnS-GCU	P	30	47744	-1	3.84e-07		2	2	30	9069	trnS-GCU	P	30	47738	-1	3.84e-07		1	2	30	9300	trnS-GCU	P	30
3	51	10813	trnG-UCC-trnR-UCU	P	51	10813	-1	1.49e-19		*	3	30	9559	trnS-GCU-trnG-UCC	F	30	31791	-2	1.67e-05		5	3	38	31069	petN-psbM	P	38	31079	-3	1.48e-08		*	3	30	9492	trnS-GCU-trnG-UCC	F	30	31810	-3	0.000468		4	3	30	24242	rpoC1 intron	P	30
4	30	23945	rpoC1 intron	P	30	24004	-3	0.000469		4	4	30	23947	rpoC1 intron	P	30	24006	-3	0.000468		*	4	43	33851	trnT-GGU-psbD	F	43	33894	0	6.36e-17		4	4	30	23982	rpoC1 intron	P	30	24041	-3	0.000468		5	4	38	31367	petN-psbM	P	38
5	38	31074	petN-psbM	P	38	31084	-3	1.49e-08		5	5	38	31082	petN-psbM	P	38	31092	-3	1.48e-08		7	5	49	40949	psaB	F	49	43173	-3	7.73e-15		5	5	38	31126	petN-psbM	P	38	31136	-3	1.48e-08		7	5	41	41048	psaB	F	41
6	43	33881	psbD	F	43	33924	0	6.37e-17		6	6	43	33893	psbD	F	43	33936	0	6.36e-17		*	6	37	44669	psbA-ycf3	F	37	44704	0	2.61e-13		7	6	41	40989	psaB	F	41	43213	-2	7.5e-12		8	6	39	46039	ycf3 intron	F	39
7	49	41008	psaB	F	49	43232	-3	7.74e-15		7	7	49	40985	psaB	F	49	43209	-3	7.73e-15		8	7	31	45649	ycf3 intron	F	31	45650	-3	0.00013		8	7	39	45980	ycf3 intron	F	39	102153	-1	1.9e-12		9	7	35	46040	ycf3 intron	P	35
8	39	45983	ycf3 intron	F	39	102503	-1	1.91e-12		8	8	39	45986	ycf3 intron	F	39	102479	-1	1.91e-12		9	8	39	45988	ycf3 intron	F	39	102539	-1	1.91e-12		9	8	35	45981	ycf3 intron	P	35	79060	-3	7.36e-07		10	8	35	46042	ycf3 intron	F	35
9	35	45984	ycf3 intron	P	35	79061	-3	7.38e-07		9	9	35	45987	ycf3 intron	P	35	79151	-3	7.37e-07		10	9	35	45989	ycf3 intron	P	35	79212	-3	7.37e-07		10	9	36	45983	ycf3 intron	F	36	124413	-1	1.12e-10		11	9	35	73853	clpP intron	R	35
10	36	45986	ycf3 intron	F	36	124614	-1	1.13e-10		10	10	36	45989	ycf3 intron	F	36	124524	-1	1.13e-10		10	10	36	45991	ycf3 intron	P	36	122095	-1	1.13e-10		*	10	30	55117	trnM-CAU	P	30	55144	-3	0.000468		21	10	31	94818	ycf2	F	31
11	36	73875	clpP intron	R	36	73884	-3	2.01e-07		*	11	32	60610	accD	R	32	60657	-3	3.57e-05		*	11	32	60638	accD	R	32	60721	-3	3.57e-05		11	11	36	73875	clpP intron	R	36	73884	-3	2.01e-07		21	11	45	94819	ycf2	F	45
12	154	86850	rpl22	F	154	87000	-1	4.37e-81		*	12	35	60625	accD	R	35	60657	-3	7.37e-07		*	12	35	60707	accD	R	35	60721	-3	7.37e-07		21	12	60	94732	ycf2	F	60	94750	-3	3.42e-21		21	12	30	94855	ycf2	F	30
13	47	86857	rpl22	F	47	87031	0	2.49e-19		11	13	36	73963	clpP intron	R	36	73972	-3	2.01e-07		11	13	36	74028	clpP intron	R	36	74037	-3	2.01e-07		21	13	45	94733	ycf2	F	45	94769	-3	1.52e-12		22	13	40	102236	rps7-trnV-GAC	F	40
14	47	86881	rpl22	F	47	87007	0	2.49e-19		12	14	30	86935	rpl22	F	30	87103	-1	3.84e-07		13	14	47	86995	rpl22	F	47	87139	0	2.49e-19		21	14	34	94744	ycf2	F	34	94780	-2	8.41e-08		22	14	30	102634	rps7-trnV-GAC	F	30
15	45	86911	rpl22	F	45	86959	-2	3.55e-14		13	15	44	86965	rpl22	F	44	87085	0	1.59e-17		21	15	31	95155	ycf2	F	31	95173	-3	0.00013		21	15	30	94769	ycf2	F	30	94787	-3	0.000468		23	15	34	111340	4.5S rRNA-5S rRNA	F	34
16	69	86935	rpl22	F	69	87061	-2	2.99e-28		21	16	31	95095	ycf2	F	31	95113	-3	0.00013		22	16	41	102537	rps7-trnV-GAC	P	41	122095	-1	1.25e-13		22	16	41	102151	rps7-trnV-GAC	F	41	124408	-1	1.25e-13
17	38	86942	rpl22	F	38	86966	-2	4.13e-10		22	17	41	102477	rps7-trnV-GAC	F	41	124519	-1	1.25e-13		24	17	34	111628	4.5S rRNA-5S rRNA	F	34	111660	-1	1.7e-09		23	17	34	111256	4.5S rRNA-5S rRNA	F	34	111288	-2	8.41e-08
18	38	86966	rpl22	F	38	87092	-1	7.44e-12		23	18	34	111568	4.5S rRNA-5S rRNA	F	34	111600	-1	1.7e-09													24	18	30	117667	rpl32-trnL-UAG	F	30	117681	-2	1.67e-05
19	47	87007	rpl22	F	47	87031	0	2.49e-19
20	48	87061	rpl22	F	48	87109	-1	8.96e-18
21	31	95119	ycf2	F	31	95137	-3	0.00013
22	41	102501	rps7-trnV-GAC	F	41	124609	-1	1.25e-13
23	34	111603	4.5S rRNA-5S rRNA	F	34	111635	-1	1.7e-09
24	35	117912	rpl32-trnL-UAG	F	35	117982	0	4.18e-12
					2	2		1
	8
	4	2
	4		4	1	2	1	0	1	0
[truncated: 3 more columns]
