# Supplementary material for: Interspecific variation and phylogenetic relationship between mangrove and non-mangrove species of a same family (Meliaceae)—insights from comparative analysis of complete chloroplast genome
Source: PeerJ. 2023 Jun 26;11:e15527. doi: 10.7717/peerj.15527 (PMC10309054; doi:10.7717/peerj.15527)
Supplement: Supplemental Information 6 [file peerj-11-15527-s006.xlsx]

## Sheet: Sheet1
Table S6 SSR position in 5 Meliaceae species chloroplast genome
Region	Code.	Region	X. granatum	X. moluccensis	X. rumphii	S. macrophylla	C. guianensis
LSC	1	trnH-GUG-psbA	(CTTA)3	(CTTA)3	(CTTA)3	(CTTA)3	(CTTA)3
	2	psbA-trnK-UUU	(TGAA)3	(TGAA)3	(TGAA)3	(TGAA)3	(TGAA)3
	3	matK-trnK-UUU			(A)10		(A)10
	4	trnK-UUU-rps16	(A)10	(A)11	(A)10	(A)11	(A)15
	5	trnK-UUU-rps16	(A)10		(T)10	(A)15	(TATT)3
	6	trnK-UUU-rps16	(TTTCTT)3
	7	rps16-trnQ-UUG	(A)10	(A)11	(A)11	(TATT)3	(T)12
	8	rps16-trnQ-UUG	(T)11	(A)10	(A)10	(T)14	(A)10
	9	rps16-trnQ-UUG			(T)11	(A)11	(A)10
	10	trnQ-UUG-psbK					(T)10
	11	psbK-psbI				(C)11
	12	trnS-GCU-trnG-UCC	(A)12	(A)10	(A)10		(A)11
	13	trnS-GCU-trnG-UCC	(A)10	(A)12			(T)10
	14	trnS-GCU-trnG-UCC				(A)12	(A)12
	15	trnG-UCC intro	(T)10	(T)11	(T)10	(T)15
	16	atpF intro	(A)10			(G)10	(A)11
	17	atpF intro	(A)12				(A)11
	18	atpF-atpH	(T)10	(T)11	(T)11	(T)12	(T)10
	19	atpF-atpH	(T)10			(TTCG)3	(T)13
	20	atpH-aptI	(TTCG)3	(TTCG)3	(TTCG)3		(TTCG)3
	21	rps2			(T)10
	22	rps2-rpoC2	(T)10	(T)10		(T)11	(T)11
	23	rpoC2	(T)12	(T)12	(T)12	(T)11	(T)11
	24	rpoC2	(AT)5	(AT)5	(AT)5	(AT)5	(AT)5
	25	rpoC1 intro	(TTAAA)3	(TTAAA)3	(TTAAA)3	(TTAAA)3	(TTAAA)3
	26	rpoB	(T)10	(T)10	(T)10	(T)10	(T)10
	27	rpoB-trnC-GCA	(A)12
	28	petN-petM		(T)10	(T)10
	29	petN-petM			(T)10
	30	psbM-trnD-GUC	(T)14	(T)14	(T)14	(T)13	(T)14
	31	psbM-trnD-GUC	(T)11			(T)10
	32	trnD-GUC-trnY-GUA	(A)10	(T)10	(T)10	(A)13	(A)10
	33	trnD-GUC-trnY-GUA	(T)10			(T)10	(T)10
	34	trnE-UUC-trnT-GGU	(AT)5	(AT)5	(AT)5	(AT)5	(AT)5
	35	trnE-UUC-trnT-GGU	(ATAG)3	(ATAG)3	(ATAG)3	(ATAG)3	(ATAG)3
	36	trnT-GGU-psbD	(A)10			(A)10	(A)11
	37	psbC-trnS-UGA		(A)10	(A)10	(A)16	(A)10
	38	trnS-UGA-psbZ	(ATCT)3	(ATCT)3	(ATCT)3	(ATCT)3	(ATCT)3
	39	trnG-UCC-trnfM-CAU	(A)13	(A)13	(A)20	(A)10	(A)12
	40	ycf3 intro	(C)10	(C)15	(T)10	(C)11(T)11	(T)12
	41	ycf3 intro		(T)12	(C)16(T)11	(T)11	(T)11
	42	ycf3 intro			(T)13
	43	rps4-trnT-UGU	(A)10	(A)11	(A)11	(T)11	(CTTTT)3
	44	rps4-trnT-UGU	(CTTTT)3	(CTTTT)3	(CTTTT)3		(T)12
	45	rps4-trnT-UGU	(T)11	(T)12	(T)11
	46	trnT-UGU-trnL-UAA	(AGAAT)3	(AGAAT)3	(AGAAT)3	(AGAAT)4	(AT)6
	47	trnT-UGU-trnL-UAA	(AT)5	(AT)5	(AT)5	(T)10	(T)11
	48	trnT-UGU-trnL-UAA	(T)10	(T)11	(T)10	(T)10	(T)10
	49	trnT-UGU-trnL-UAA	(AT)5	(T)10	(AT)5	(A)10	(AT)5
	50	trnT-UGU-trnL-UAA		(AT)5		(AT)5
	51	trnL-UAA intro	(T)13	(T)12	(T)14	(T)12	(T)13
	52	trnF-GAA-ndhJ	(ATAC)3	(ATAC)3	(ATAC)3	(ATAC)3	(ATAC)3
	53	trnF-GAA-ndhJ	(ATA)4	(ATA)4	(ATA)4	(T)13	(ATA)4
	54	ndhK-ndhC	(T)12	(T)13	(T)13	(T)11	(T)11
	55	trnV-UAC intro	(T)10	(T)10	(T)10	(T)10
	56	atpE-atpB	(T)11	(T)11	(T)11
	57	atpB				(T)11
	58	aptB-rbcL	(T)15	(T)12	(T)11	(T)10	(T)12
	59	aptB-rbcL		(A)11	(A)10	(A)12	(T)10
	60	aptB-rbcL					(A)10
	61	accD-psaI	(TTAG)3	(TTAG)3	(TTAG)3	(TTAG)3	(TTAG)3
	62	accD-psaI	(T)11	(T)10	(T)10	(T)11	(T)10
	63	accD-psaI		(T)17	(T)19		(T)19
	64	psaI-ycf4	(T)10	(T)10	(T)10	(T)18	(T)10
	65	ycf4-cemA	(T)12	(T)11	(T)10		(T)11
	66	cemA	(TC)5	(TC)5	(TC)5	(TC)5	(TC)5
	67	petA-psbJ	(A)10	(A)11	(A)11	(A)10	(A)10
	68	petA-psbJ	(A)10	(A)10	(A)10	(A)10
	69	psbE-petL	(A)14	(A)13	(A)12	(A)19	(C)11
	70	psbE-petL					(A)15
	71	trnW-CCA-trnP-UGG	(T)12	(T)10	(A)14	(T)11
	72	psaJ-rpl33	(T)14	(T)15	(T)10	(T)15	(T)15
	73	psaJ-rpl33	(TAGA)3	(TAGA)3	(T)15	(TAGA)3	(TAGA)3
	74	psaJ-rpl33			(TAGA)3
	75	rpl33-rps18	(AAAT)3	(AAAT)3	(AAAT)3	(AAAT)3	(AAAT)3
	76	rps18-rpl20	(T)13	(T)10	(T)10	(T)13	(T)11
	77	clpP intron	(T)10	(T)12	(T)10	(T)11	(T)10
	78	clpP intron	(T)11	(A)11	(T)11	(T)13	(A)13
	79	clpP intron	(A)11	(T)12	(A)11	(A)10	(A)10
	80	clpP intron	(A)10		(A)10	(T)13	(T)11
	81	clpP intron	(T)11		(T)11	(A)13
	82	clpP-psbB	(A)11				(A)11
	83	psbB-psbT	(T)10	(T)12	(T)12	(T)12	(A)11
	84	psbH-petB				(T)10	(T)14
	85	petB intro	(A)10	(A)10		(A)12	(T)11
	86	petD-rpoA	(T)11	(T)12	(T)10		(T)10
	87	rpl36-rps8	(T)10	(T)10	(T)13	(T)11	(T)15
	88	rpl36-rps8	(T)12	(T)13			(T)12
	89	rpl36-rps8					(T)11
	90	rps8-rpl14		(T)10	(T)10	(T)11	(A)14
	91	rpl14-rpl16	(A)14	(A)12	(A)14	(A)13
	92	rpl14-rpl16				(T)10
	93	rpl16 intro	(T)13	(T)11	(T)10		(T)14
	94	rpl16 intro	(T)11		(T)13
IRA	95	ycf2-trnL-CAA	(AAG)4	(AAG)4	(AAG)4	(AAG)4	(AAG)4
	96	rps7-trnV-GAC		(T)12	(T)12	(T)12	(T)11
	97	5s rRNA-trnR-ACG				(A)11	(A)11
	98	trnI-GAU		(AAG)4	(AAG)4
	99	trnR-ACG-trnN-GUU	(T)10	(T)10	(T)10	(T)12	(T)10
	100	ycf1	(A)12	(A)12	(A)12	(A)12	(A)12
SSC	101	ndhF-rpl32	(A)11	(A)11	(A)10	(A)11	(A)13
	102	ndhF-rpl32	(A)10	(A)11		(A)13	(A)11
	103	ndhF-rpl32	(T)10	(T)10		(A)11
	104	ndhF-rpl32	(T)10	(T)10
	105	rpl32			(T)10
	106	rpl32-trnL-UAG	(T)10	(T)10	(A)10		(T)10
	107	rpl32-trnL-UAG	(T)10	(A)10	(A)11		(A)11
	108	rpl32-trnL-UAG	(A)11	(A)11			(A)11
	109	trnL-UAG-ccsA		(T)11	(T)13		(T)11
	110	ccsA				(T)14
	111	ccsA-ndhD	(T)10	(T)10	(T)10		(T)10
	112	ccsA-ndhD	(T)11				(T)10
	113	ccsA-ndhD					(T)11
	114	ndhD		(AT)5	(AT)5	(AT)5	(AT)5
	115	ndhG		(AAAT)3	(AAAT)3
	116	ndhG-ndhI	(AAAT)3			(AAAT)3	(AAAT)3
	117	ndhI		(TTTC)3
	118	ndhI-ndhA	(TTTC)3		(TTTC)3	(TTTC)3	(TTTC)3
	119	ndhA intro	(A)10	(T)10	(T)10	(T)15	(T)11
	120	ndhA intro				(T)13
	121	rps15		(T)11	(AAT)4
	122	rps15		(AAT)4
	123	rps15-ycf1	(T)10			(AAT)4	(AAT)4
	124	rps15-ycf1	(AAT)4			(A)10	(A)11
IRB	125	ycf1	(T)10	(T)10	(T)10	(T)10	(T)10
	126	ycf1	(T)10	(T)10	(T)10	(T)14	(T)10
	127	ycf1	(T)14	(T)10	(T)10	(T)11	(T)14
	128	ycf1	(T)11	(T)14	(T)14	(T)10	(T)11
	129	ycf1	(T)13	(T)11	(T)11	(T)17	(T)13
	130	ycf1		(T)13	(T)13	(A)10
