# Supplementary material for: Interspecific variation and phylogenetic relationship between mangrove and non-mangrove species of a same family (Meliaceae)—insights from comparative analysis of complete chloroplast genome
Source: PeerJ. 2023 Jun 26;11:e15527. doi: 10.7717/peerj.15527 (PMC10309054; doi:10.7717/peerj.15527)
Supplement: Supplemental Information 7 [file peerj-11-15527-s007.xlsx]

## Sheet: Sheet1
Table S7 Percentage of variation sites in each region
No.	Position	X. granatum vs X. moluccensis	X. granatum vs X. rumphii	X. granatum vs C. guianensis	X. granatum vs S. macrophylla	Scopes	Regions
1	trnH-GUG	0.0133333	0.0133333	0.038961	0.0263158	LSC	coding region
2	psbA	0.00094162	0.00094162	0.00376648	0.0047081	LSC	coding region
3	matK	0.00724638	0.00724638	0.00922266	0.0111989	LSC	coding region
4	rps16	0	0	0.0149813	0.0149813	LSC	coding region
5	psbK	0.0107527	0.0107527	0.0107527	0.0107527	LSC	coding region
6	trnS-GCU	0	0	0	0.0113636	LSC	coding region
7	atpA	0.00131492	0.00131492	0.00360794	0.00661455	LSC	coding region
8	atpF	0	0	0.00720721	0.00720721	LSC	coding region
9	atpH	0.00406504	0.00406504	0.00813008	0.0121951	LSC	coding region
10	atpI	0.00134409	0.00134409	0.00268817	0.00672043	LSC	coding region
11	rps2	0.00984529	0.00984529	0.0112518	0.0126582	LSC	coding region
12	rpoC2	0.00309967	0.00309967	0.00476872	0.00429185	LSC	coding region
13	rpoC1	0.000964785	0.000964785	0.00241196	0.00337675	LSC	coding region
14	rpoB	0.00124494	0.00124494	0.00217865	0.0043573	LSC	coding region
15	psbM	0	0	0.00877193	0	LSC	coding region
16	trnD-GUC	0	0	0.0135135	0.0135135	LSC	coding region
17	trnE-UUC	0	0	0	0.0136986	LSC	coding region
18	trnT-GGU	0	0	0.0138889	0	LSC	coding region
19	psbD	0	0	0.00094162	0.00094162	LSC	coding region
20	psbC	0.00140647	0.00140647	0.0021097	0.00281294	LSC	coding region
21	psbZ	0	0	0.00529101	0.010582	LSC	coding region
22	trnG-UCC	0.0140845	0.0140845	0.0140845	0.0140845	LSC	coding region
23	trnfM-CAU	0	0	0.0135135	0.0135135	LSC	coding region
24	rps14	0.00660066	0.00330033	0	0	LSC	coding region
25	psaB	0.000907029	0.000907029	0.00226757	0.00226757	LSC	coding region
26	psaA	0	0.000443853	0.00133156	0.00266312	LSC	coding region
27	ycf3	0	0	0.00392157	0.00588235	LSC	coding region
28	trnS-GGA	0	0	0.0114943	0	LSC	coding region
29	rps4	0.0049505	0.00330033	0.00330033	0.0049505	LSC	coding region
30	trnL-UAA	0	0.0114943	0	0	LSC	coding region
31	ndhJ	0	0	0.00419287	0.00209644	LSC	coding region
32	ndhK	0	0	0	0.00292398	LSC	coding region
33	ndhC	0	0	0.00275482	0.00550964	LSC	coding region
34	atpE	0.00248756	0.00248756	0.00497512	0.00497512	LSC	coding region
35	atpB	0.00267201	0.00200401	0.00465116	0.00334001	LSC	coding region
36	rbcL	0	0.00070028	0.00280112	0.0035014	LSC	coding region
37	accD	0.00516796	0.00621891	0.00406504	0.00813008	LSC	coding region
38	ycf4	0.0036036	0.0036036	0.0036036	0.0036036	LSC	coding region
39	cemA	0.00572246	0.00572246	0.00572246	0.00572246	LSC	coding region
40	petA	0	0	0.00103842	0.00103842	LSC	coding region
41	psbJ	0	0	0.00813008	0	LSC	coding region
42	psbE	0	0	0.00396825	0	LSC	coding region
43	trnP-UGG	0.0135135	0.0135135	0.0135135	0.0135135	LSC	coding region
44	psaJ	0	0	0.00740741	0.00740741	LSC	coding region
45	rpl33	0.00497512	0.00497512	0.00497512	0.00995025	LSC	coding region
46	rps18	0.00326797	0.00326797	0.00653595	0.00980392	LSC	coding region
47	rpl20	0	0	0.00282486	0.00847458	LSC	coding region
48	clpP	0.0170068	0.0170068	0.0085034	0.0119048	LSC	coding region
49	psbB	0.000654879	0.000654879	0.000654879	0.00130976	LSC	coding region
50	petB	0.00617284	0.00617284	0.00617284	0.00462963	LSC	coding region
51	petD	0	0	0.00205761	0.00205761	LSC	coding region
52	rpoA	0.00406504	0.00304878	0.00609756	0.00304878	LSC	coding region
53	rps11	0.0167866	0.0167866	0.0167866	0.0215827	LSC	coding region
54	rpl36	0	0	0.00877193	0	LSC	coding region
55	rps8	0.00246914	0.00246914	0.00493827	0.00493827	LSC	coding region
56	rpl14	0.00542005	0.00542005	0.00542005	0.00542005	LSC	coding region
57	rpl16	0.00243309	0.00243309	0.00973236	0.00973236	LSC	coding region
58	rps3	0.00151515	0.00151515	0.0106061	0.00909091	LSC	coding region
59	rpl22	0.0349462	0.0282258	0.016129	0.0241935	IRa	coding region
60	rps19	0	0	0	0.00358423	IRa	coding region
61	rpl23	0.0035461	0.0035461	0.0035461	0.0035461	IRa	coding region
62	ycf2	0.000292398	0.000584795	0.000726533	0.0013089	IRa	coding region
63	rrn16	0.000670691	0.000670691	0.00134138	0.00201207	IRa	coding region
64	trnA-UGC	0.0136986	0.0136986	0.0136986	0.0136986	IRa	coding region
65	rrn23	0	0	0.000711744	0.000711744	IRa	coding region
66	ycf1	0.00174978	0.00262467	0.00349956	0.00524934	IRa	coding region
67	ndhF	0.00493495	0.00448632	0.00762674	0.0121131	SSC	coding region
68	rpl32	0.0188679	0.0188679	0.0308642	0.0314465	SSC	coding region
69	ccsA	0.003125	0.00416667	0.00625	0.0104167	SSC	coding region
70	ndhD	0.00196078	0.00196078	0.00392157	0.00522876	SSC	coding region
71	psaC	0.00406504	0.00406504	0.00406504	0.00406504	SSC	coding region
72	ndhE	0.00326797	0.00326797	0.00326797	0.00653595	SSC	coding region
73	ndhG	0	0	0.00558659	0.00558659	SSC	coding region
74	ndhI	0	0	0	0.00396825	SSC	coding region
75	ndhA	0.0018315	0.00274725	0.00457875	0.00641026	SSC	coding region
76	ndhH	0.00253807	0.00169205	0.00253807	0.00338409	SSC	coding region
77	rps15	0	0	0	0.003663	SSC	coding region
78	ycf1	0.00670766	0.00485256	0.010265	0.0130354	SSC	coding region
79	trnK-UUU-intron	0.00750691	0.00829384	0.0094451	0.0133753	LSC	noncoding region
80	rps16-intron	0.00566893	0.0045403	0.00681044	0.015891	LSC	noncoding region
81	trnG-UCC-intron	0.00549451	0.00275103	0.00694444	0.0108992	LSC	noncoding region
82	atpF-intron	0.0039267	0.0052356	0.00522876	0.0078329	LSC	noncoding region
83	rpoC1-intron	0.0221066	0.0221066	0.0221066	0.0247074	LSC	noncoding region
84	ycf3-intron	0.00654022	0.00718016	0.00855263	0.00523903	LSC	noncoding region
85	trnL-UAA-intron	0.00377358	0.00376648	0.00754717	0.00566038	LSC	noncoding region
86	trnV-UAC-intron	0	0	0.00506757	0.0135135	LSC	noncoding region
87	clpP-intron	0.00330033	0.000660939	0.00594059	0.00724638	LSC	noncoding region
88	petB-intron	0.00612745	0.00490196	0.00615764	0.0098401	LSC	noncoding region
89	petD-intron	0.00276243	0.00276243	0.0138122	0.0151934	LSC	noncoding region
90	rpl16-intron	0.00325027	0.004329	0.00756757	0.00542299	LSC	noncoding region
91	trnI-GAU-intron	0	0	0	0.00104822	IRA	noncoding region
92	trnA-UGC-intron	0.00118343	0.00118343	0.00119048	0	IRA	noncoding region
93	ndhA-intron	0.00362976	0.00272232	0.00908265	0.0133571	SSC	noncoding region
94	trnH-GUG-psbA	0.0285088	0.0243363	0.0239651	0.00665188	LSC	noncoding region
95	psbA-matK	0.00998336	0.0116473	0.013468	0.0185185	LSC	noncoding region
96	trnK-UUU-rps16	0.00917431	0.00810185	0.0172018	0.0424312	LSC	noncoding region
97	rps16-trnQ-UUG	0.00789096	0.00642398	0.0114068	0.012285	LSC	noncoding region
98	trnQ-UUG-psbK	0.00271739	0.00543478	0.0189702	0.0163043	LSC	noncoding region
99	psbK-psbI	0.00273224	0.00273224	0.010929	0.0217391	LSC	noncoding region
100	psbI-trnS-GCU	0.00704225	0.00704225	0.0140845	0.0340136	LSC	noncoding region
101	trnS-GCU-trnG-UCC	0.00977995	0.0122549	0.0156438	0.021978	LSC	noncoding region
102	trnG-UCC-trnR-UCU	0	0.0129032	0.0129032	0.0258065	LSC	noncoding region
103	trnR-UCU-atpA	0.0217391	0.0217391	0	0	LSC	noncoding region
104	atpA-atpF	0.0181818	0.0181818	0.0727273	0.0181818	LSC	noncoding region
105	atpF-atpH	0.00628931	0.00628931	0.0163934	0.01875	LSC	noncoding region
106	atpH-atpI	0	0.00167224	0.00501672	0.00747508	LSC	noncoding region
107	atpI-rps2	0	0	0.0120968	0.00403226	LSC	noncoding region
108	rps2-rpoC2	0.00505051	0.00505051	0.0100503	0.0150754	LSC	noncoding region
109	rpoC2-rpoC1	0.00546448	0.00546448	0.00546448	0.010929	LSC	noncoding region
110	rpoB-trnC-GCA	0.00566038	0.00660377	0.0112465	0.0113101	LSC	noncoding region
111	trnC-GCA-petN	0.00561798	0.00280899	0.0070028	0.012605	LSC	noncoding region
112	petN-psbM	0.00552995	0.00368324	0.0027907	0.00732601	LSC	noncoding region
113	psbM-trnD-GUC	0.0034965	0.00699301	0.0139616	0.00699301	LSC	noncoding region
114	trnD-GUC-trnY-GUA	0	0	0.00206612	0.00616016	LSC	noncoding region
115	trnY-GUA-trnE-UUC	0	0	0	0.0169492	LSC	noncoding region
116	trnE-UUC-trnT-GGU	0.0107143	0.011976	0.00359712	0.0131894	LSC	noncoding region
117	trnT-GGU-psbD	0.00312256	0.00312256	0.00701481	0.00858704	LSC	noncoding region
118	psbC-trnS-UGA	0.0334728	0.0292887	0.0292887	0.0375	LSC	noncoding region
119	trnS-UGA-psbZ	0.0143678	0.0114943	0.00862069	0.0114943	LSC	noncoding region
120	psbZ-trnG-UCC	0.0137694	0.012069	0.0102215	0.0155172	LSC	noncoding region
121	trnG-UCC-trnfM-CAU	0.00606061	0.00581395	0.00584795	0.0118343	LSC	noncoding region
122	trnfM-CAU-rps14	0.00617284	0.00617284	0	0	LSC	noncoding region
123	rps14-psaB	0	0	0	0.00699301	LSC	noncoding region
124	psaA-ycf3	0.00307692	0.00291971	0.00304414	0.00461538	LSC	noncoding region
125	ycf3-trnS-GGA	0.00571429	0.00794552	0.00685714	0.01359	LSC	noncoding region
126	trnS-GGA-rps4	0.00664452	0.00332226	0.00996678	0.00332226	LSC	noncoding region
127	rps4-trnT-UGU	0.00534759	0.00268097	0.0230179	0.0134409	LSC	noncoding region
128	trnT-UGU-trnL-UAA	0.00509684	0.00510204	0.011213	0.0111675	LSC	noncoding region
129	trnL-UAA-trnF-GAA	0.00533333	0.00266667	0.0133333	0.0133333	LSC	noncoding region
130	trnF-GAA-ndhJ	0.00468384	0.00468384	0.0112613	0.0243363	LSC	noncoding region
131	ndhK-ndhC	0.0166667	0.0166667	0	0	LSC	noncoding region
132	ndhC-trnV-UAC	0.00548246	0.00548246	0.0162514	0.0164654	LSC	noncoding region
133	trnM-CAU-atpE	0.00398406	0	0.00398406	0.0198413	LSC	noncoding region
134	atpB-rbcL	0.00511509	0.0025641	0.00897436	0.0140665	LSC	noncoding region
135	rbcL-accD	0.006	0.006	0.0108696	0.00905797	LSC	noncoding region
136	accD-psaI	0.00694444	0.00694444	0.00972222	0.00554785	LSC	noncoding region
137	psaI-ycf4	0.00700935	0.00700935	0.00909091	0.0114679	LSC	noncoding region
138	ycf4-cemA	0.0010661	0.00106724	0.00639659	0.00748663	LSC	noncoding region
139	cemA-petA	0.00436681	0.00436681	0	0	LSC	noncoding region
140	petA-psbJ	0.00559701	0.00559701	0.015873	0.0120594	LSC	noncoding region
141	psbJ-psbL	0.00704225	0.00704225	0.00704225	0.0140845	LSC	noncoding region
142	psbE-petL	0.00155885	0.00155885	0.00546875	0.01554	LSC	noncoding region
143	petL-petG	0	0	0	0.0120482	LSC	noncoding region
144	petG-trnW-CCA	0.00684932	0.00684932	0.00684932	0.00684932	LSC	noncoding region
145	trnW-CCA-trnP-UGG	0.0115607	0.0115607	0.0231214	0.0115607	LSC	noncoding region
146	trnP-UGG-psaJ	0.0027933	0.0027933	0.0111732	0.0223464	LSC	noncoding region
147	psaJ-rpl33	0.00666667	0.00444444	0.0155556	0.00666667	LSC	noncoding region
148	rpl33-rps18	0.00507614	0.00507614	0.0147783	0.0101523	LSC	noncoding region
149	rps18-rpl20	0.00411523	0.00411523	0.00411523	0.00411523	LSC	noncoding region
150	rpl20-clpP	0.00293255	0.00195503	0.00680934	0.0077821	LSC	noncoding region
151	clpP-psbB	0.0114155	0.00913242	0.00456621	0.0113895	LSC	noncoding region
152	psbB-psbT	0.026738	0.0320856	0.031746	0.0427807	LSC	noncoding region
153	psbN-psbH	0	0	0.00961538	0.00961538	LSC	noncoding region
154	psbH-petB	0.00819672	0	0	0.0166667	LSC	noncoding region
155	petB-petD	0.00559284	0.0033557	0.0111857	0.0111857	LSC	noncoding region
156	petD-rpoA	0.00395257	0.00396825	0.00396825	0.00396825	LSC	noncoding region
157	rpoA-rps11	0	0	0	0	LSC	noncoding region
158	rps11-rpl36	0.00813008	0.00813008	0.00813008	0.0162602	LSC	noncoding region
159	rpl36-rps8	0.00821355	0.0102669	0.0218688	0.0184805	LSC	noncoding region
160	rps8-rpl14	0.00617284	0.00617284	0.0245399	0.0306748	LSC	noncoding region
161	rpl14-rpl16	0.00763359	0	0.0152672	0.0152672	LSC	noncoding region
162	rpl22-rps19	0.0222222	0.0222222	0.0222222	0.0222222	IRA	noncoding region
163	ycf2-trnL-CAA	0.00099108	0.00396432	0.00099108	0.0049554	IRA	noncoding region
164	trnL-CAA-ndhB	0.00170068	0.00170068	0.00170068	0.00170068	IRA	noncoding region
165	rps7-trnV-GAC	0.00150943	0.00188679	0.000754148	0.00188395	IRA	noncoding region
166	rrn16-trnI-GAU	0	0	0	0.0268657	IRA	noncoding region
167	trnI-GAU-trnA-UGC	0.00961538	0.00961538	0	0	IRA	noncoding region
168	trnA-UGC-rrn23	0	0	0	0.00613497	IRA	noncoding region
169	rrn4.5-rrn5	0	0	0	0.00390625	IRA	noncoding region
170	rrn5-trnR-ACG	0	0	0.00398406	0.00398406	IRA	noncoding region
171	trnR-ACG-trnN-GUU	0.00163399	0.00163399	0.00806452	0.00977199	IRA	noncoding region
172	trnN-GUU-ycf1	0	0	0.00566572	0.00597015	IRA	noncoding region
173	ndhF-rpl32	0.00799201	0.00900901	0.0149701	0.0269192	SSC	noncoding region
174	rpl32-trnL-UAG	0.0153483	0.0141677	0.0103986	0.0272572	SSC	noncoding region
175	trnL-UAG-ccsA	0.0192308	0.0283019	0.00961538	0.0173913	SSC	noncoding region
176	ccsA-ndhD	0.00636943	0.003367	0.0434783	0.0167785	SSC	noncoding region
177	ndhD-psaC	0.00729927	0	0.0145985	0.0217391	SSC	noncoding region
178	psaC-ndhE	0.00851064	0.0042735	0.00854701	0.0213675	SSC	noncoding region
179	ndhE-ndhG	0.00387597	0.0116279	0.00775194	0	SSC	noncoding region
180	ndhG-ndhI	0	0	0.00537634	0.00537634	SSC	noncoding region
181	ndhI-ndhA	0.0123457	0.0123457	0.0123457	0.0123457	SSC	noncoding region
182	ndhH-rps15	0.0319149	0.0212766	0.0106383	0.0319149	SSC	noncoding region
183	rps15-ycf1	0.0113636	0.00854701	0.0169972	0.0227273	SSC	noncoding region
