# Supplementary material for: Interspecific variation and phylogenetic relationship between mangrove and non-mangrove species of a same family (Meliaceae)—insights from comparative analysis of complete chloroplast genome
Source: PeerJ. 2023 Jun 26;11:e15527. doi: 10.7717/peerj.15527 (PMC10309054; doi:10.7717/peerj.15527)
Supplement: Supplemental Information 8 [file peerj-11-15527-s008.xlsx]

## Sheet: Sheet1
Table S8 Nonsynonymous substitution (dN), Synonymous substitution (dS), and dN/dS (ω) values for individual genes or gene groups
				S.macrophylla-C.guianensis	X.granatum-C.guianensis	X.granatum-S.macrophylla	X. moluccensis-C.guianensis	X. moluccensis-S.macrophylla	X. moluccensis-X.granatum	X.rumphii-C.guianensis	X.rumphii-S.macrophylla	X.rumphii-X.granatum	X.rumphii-X. moluccensis
accd			dn	0.0041	0.004	0.008	0.0072	0.0113	0.0056	0.0088	0.0129	0.0064	0.0024
			ds	0.0089	0	0.0096	0.0048	0.0145	0.0048	0.0048	0.0144	0.0048	0
		accd	ω	0.460674		0.833333	1.5	0.77931	1.16667	1.83333	0.895833	1.33333
atp	atpA		dn	0.0044	0.007	0.0096	0.0052	0.0079	0.0017	0.0052	0.0079	0.0017	0
			ds	0.0083	0.0028	0.0111	0.0028	0.0111	0	0.0028	0.0111	0	0
		atpA	ω	0.53012	2.5	0.864865	1.85714	0.711712		1.85714	0.711712
	atpB		dn	0.002	0.003	0.003	0.0049	0.0049	0.004	0.004	0.004	0.003	0.001
			ds	0.0083	0.0055	0.0028	0.0055	0.0028	0	0.0055	0.0028	0	0
		atpB	ω	0.240964	0.545455	1.07143	0.890909	1.75		0.727273	1.42857
	atpE		dn	0.0033	0.0065	0.0033	0.0033	0	0.0033	0.0033	0	0.0033	0
			ds	0.0109	0	0.0109	0	0.0109	0	0	0.0109	0	0
		atpE	ω	0.302752		0.302752		0			0
	atpF		dn	0.0025	0.0024	0.0049	0.0024	0.0049	0	0.0024	0.0049	0	0
			ds	0.007	0.0213	0.0141	0.0213	0.0141	0	0.0213	0.0141	0	0
		atpF	ω	0.357143	0.112676	0.347518	0.112676	0.347518		0.112676	0.347518
	atpH		dn	0	0	0	0	0	0	0	0	0	0
			ds	0.0176	0.035	0.0533	0.0173	0.0353	0.0172	0.0172	0.0352	0.0172	0
		atpH	ω	0	0	0	0	0	0	0	0	0
	atpI		dn	0.0073	0.0018	0.0054	0.0018	0.0053	0	0.0018	0.0053	0	0
			ds	0.0053	0.0055	0.0111	0.0113	0.0171	0.0057	0.0115	0.0173	0.0058	0
		atpI	ω	1.37736	0.327273	0.486486	0.159292	0.309942	0	0.156522	0.306358	0
ccsA			dn	0.0095	0.0067	0.0107	0.0107	0.012	0.004	0.0107	0.012	0.004	0
			ds	0.0096	0.005	0.0051	0.0051	0.0104	0	0.0103	0.0156	0.0051	0.0052
		ccsA	ω	0.989583	1.34	2.09804	2.09804	1.15385		1.03883	0.769231	0.784314	0
cemA			dn	0.0059	0.0058	0.0077	0.0038	0.0057	0.0057	0.0038	0.0057	0.0056	0
			ds	0.0055	0.0057	0	0.0119	0.006	0.0061	0.0123	0.0061	0.0062	0
		cemA	ω	1.07273	1.01754		0.319328	0.95	0.934426	0.308943	0.934426	0.903226
clpP			dn	0.0024	0.0118	0.0142	0.0227	0.0252	0.0226	0.0227	0.0252	0.0226	0
			ds	0.0063	0	0.0063	0.0032	0.0095	0.0032	0.0032	0.0095	0.0032	0
		clpP	ω	0.380952		2.25397	7.09375	2.65263	7.0625	7.09375	2.65263	7.0625
matK			dn	0.0113	0.0086	0.0112	0.0086	0.0112	0.0051	0.0086	0.0112	0.0051	0.0017
			ds	0.0056	0.0116	0.0116	0.0146	0.0146	0.0146	0.0146	0.0146	0.0147	0
		matK	ω	2.01786	0.741379	0.965517	0.589041	0.767123	0.349315	0.589041	0.767123	0.346939
ndh	ndhA		dn	0.0036	0.0024	0.0036	0.0024	0.0036	0	0.0024	0.0036	0	0
			ds	0.0195	0.0117	0.0156	0.0197	0.0237	0.0078	0.0237	0.0278	0.0117	0.0039
		ndhA	ω	0.184615	0.205128	0.230769	0.121827	0.151899	0	0.101266	0.129496	0	0
	ndhB		dn
			ds	0	0	0	0	0	0	0	0	0	0
		ndhB	ω
	ndhC		dn	0.0036	0.0036	0.0072	0.0036	0.0072	0	0.0036	0.0072	0	0
			ds	0	0	0	0	0	0	0	0	0	0
		ndhC	ω
	ndhD		dn	0.0036	0.0036	0.0053	0.0035	0.0053	0.0018	0.0035	0.0053	0.0018	0
			ds	0.0052	0.0054	0.0055	0.0028	0.0028	0.0028	0.0028	0.0028	0.0028	0
		ndhD	ω	0.692308	0.666667	0.963636	1.25	1.89286	0.642857	1.25	1.89286	0.642857
	ndhE		dn	0	0	0	0	0	0	0	0	0	0
			ds	0.0136	0.0137	0.0276	0	0.0136	0.0137	0	0.0136	0.0137	0
		ndhE	ω	0	0	0		0	0		0	0
	ndhF		dn	0.0073	0.0061	0.01	0.0061	0.01	0.0044	0.0061	0.01	0.0044	0
			ds	0.0167	0.0146	0.0172	0.0172	0.0147	0.0123	0.0147	0.0122	0.0098	0.0024
		ndhF	ω	0.437126	0.417808	0.581395	0.354651	0.680272	0.357724	0.414966	0.819672	0.44898	0
	ndhG		dn	0.0025	0.0025	0.005	0.0025	0.005	0	0.0025	0.005	0	0
			ds	0.0239	0.0157	0.0078	0.0157	0.0078	0	0.0157	0.0078	0	0
		ndhG	ω	0.104603	0.159236	0.641026	0.159236	0.641026		0.159236	0.641026
	ndhH		dn	0.0032	0.0021	0.0011	0.0043	0.0032	0.0021	0.0043	0.0032	0.0021	0
			ds	0.0164	0.0041	0.0123	0.0082	0.0165	0.0041	0.0041	0.0124	0	0.0041
		ndhH	ω	0.195122	0.512195	0.0894309	0.52439	0.193939	0.512195	1.04878	0.258065		0
	ndhI		dn	0.0024	0	0.0024	0	0.0024	0	0	0.0024	0	0
			ds	0.011	0	0.011	0	0.011	0	0	0.011	0	0
		ndhI	ω	0.218182		0.218182		0.218182			0.218182
	ndhJ		dn	0.0028	0.0055	0.0028	0.0055	0.0028	0	0.0055	0.0028	0	0
			ds	0	0	0	0	0	0	0	0	0	0
		ndhJ	ω
	ndhK		dn	0.0019	0	0.0019	0	0.0019	0	0	0.0019	0	0
			ds	0.0063	0	0.0063	0	0.0063	0	0	0.0063	0	0
		ndhK	ω	0.301587		0.301587		0.301587			0.301587
psaA			dn	0.0024	0.0006	0.0018	0.0006	0.0018	0	0.0006	0.0018	0	0
			ds	0.0053	0.0036	0.0054	0.0036	0.0055	0	0.0055	0.0074	0.0018	0.0018
		psaA	ω	0.45283	0.166667	0.333333	0.166667	0.327273		0.109091	0.243243	0	0
pet	petB		dn	0	0	0	0	0	0	0	0	0	0
			ds	0.0064	0.026	0.0194	0.0129	0.0064	0.0261	0.0129	0.0064	0.0261	0
		petB	ω	0	0	0	0	0	0	0	0	0
	petD		dn	0.0056	0.0028	0.0028	0.0028	0.0028	0	0.0028	0.0028	0	0
			ds	0	0	0	0	0	0	0	0	0	0
		petD	ω
	petG		dn	0	0	0	0	0	0	0	0	0	0
			ds	0	0	0	0	0	0	0	0	0	0
		petG	ω
	petL		dn	0	0	0	0	0	0	0	0	0	0
			ds	0	0	0	0	0	0	0	0	0	0
		petL	ω
	petN		dn	0	0	0	0	0	0	0	0	0	0
			ds	0	0	0	0	0	0	0	0	0	0
		petN	ω
psa	psaB		dn	0	0	0	0	0	0	0	0	0	0
			ds	0.0076	0.0095	0.0096	0.0095	0.0057	0.0038	0.0095	0.0057	0.0038	0
		psaB	ω	0	0	0	0	0	0	0	0	0
	psaC		dn	0	0	0	0	0	0	0	0	0	0
			ds	0	0.019	0.019	0	0	0.019	0	0	0.019	0
		psaC	ω		0	0			0			0
	psaI		dn	0	0	0	0	0	0	0	0	0	0
			ds	0	0	0	0	0	0	0	0	0	0
		psaI	ω
	psaJ		dn	0	0	0	0	0	0	0	0	0	0
			ds	0	0.0225	0.0225	0.0225	0.0225	0	0.0225	0.0225	0	0
		psaJ	ω		0	0	0	0		0	0
psb	psbA		dn	0.0025	0.0013	0.0013	0.0013	0.0012	0	0.0012	0.0012	0	0
			ds	0.0114	0.0115	0.0155	0.0078	0.0117	0.0039	0.0079	0.0119	0.004	0
		psbA	ω	0.219298	0.113043	0.083871	0.166667	0.102564	0	0.151899	0.10084	0
	psbB		dn	0.0009	0.0009	0	0.0009	0	0	0.0009	0	0	0
			ds	0.0054	0	0.0054	0.0027	0.0082	0.0027	0.0027	0.0082	0.0027	0
		psbB	ω	0.166667		0	0.333333	0	0	0.333333	0	0
	psbC		dn	0	0	0	0	0	0	0	0	0	0
			ds	0.0027	0.0027	0.0054	0.0027	0.0054	0	0.0027	0.0054	0	0
		psbC	ω	0	0	0	0	0		0	0
	psbD		dn	0	0	0	0	0	0	0	0	0	0
			ds	0	0.0037	0.0037	0.0037	0.0037	0	0.0037	0.0037	0	0
		psbD	ω		0	0	0	0		0	0
	psbE		dn	0	0	0	0	0	0	0	0	0	0
			ds	0.016	0.016	0	0.016	0	0	0.016	0	0	0
		psbE	ω	0	0		0			0
	psbF		dn	0	0	0	0	0	0	0	0	0	0
			ds	0	0	0	0	0	0	0	0	0	0
		psbF	ω
	psbH		dn	0	0	0	0	0	0	0	0	0	0
			ds	0	0	0	0	0	0	0	0	0	0
		psbH	ω
	psbJ		dn	0	0	0	0	0	0	0	0	0	0
			ds	0.0339	0.0339	0	0.0339	0	0	0.0339	0	0	0
		psbJ	ω	0	0		0			0
	psbK		dn	0.0142	0.014	0.014	0.0139	0.0139	0.0139	0.0139	0.0139	0.0139	0
			ds	0	0	0	0	0	0	0	0	0	0
		psbK	ω
	psbL		dn	0	0	0	0	0	0	0	0	0	0
			ds	0	0	0	0	0	0	0	0	0	0
		psbL	ω
	psbM		dn	0	0	0	0	0	0	0	0	0	0
			ds	0.0439	0.0439	0	0.0439	0	0	0.0439	0	0	0
		psbM	ω	0	0		0			0
	psbN		dn	0	0	0	0	0	0	0	0	0	0
			ds	0	0	0	0	0	0	0	0	0	0
		psbN	ω
	psbT		dn	0	0	0	0	0	0	0	0	0	0
			ds	0	0	0	0	0	0	0	0	0	0
		psbT	ω
	psbZ		dn	0.0071	0	0.0071	0	0.0071	0	0	0.0071	0	0
			ds	0	0.0232	0.0232	0.0232	0.0232	0	0.0232	0.0232	0	0
		psbZ	ω		0	0.306034	0	0.306034		0	0.306034
rbcL			dn	0.0019	0.0028	0.0009	0.0028	0.0009	0	0.0028	0.0019	0.0009	0.0009
			ds	0.0086	0.0029	0.0115	0.0029	0.0115	0	0.0029	0.0115	0	0
		rbcL	ω	0.22093	0.965517	0.0782609	0.965517	0.0782609		0.965517	0.165217
rpl	rpl2		dn	0	0	0	0	0	0	0	0	0	0
			ds	0	0	0	0	0	0	0	0	0	0
		rpl2	ω
	rpl14		dn	0	0.0071	0.0071	0	0	0.007	0	0	0.007	0
			ds	0	0	0	0	0	0	0	0	0	0
		rpl14	ω
	rpl16		dn	0.003	0.003	0	0.003	0	0	0.003	0	0	0
			ds	0.0402	0.0391	0.0536	0.0261	0.04	0.0127	0.0261	0.04	0.0127	0
		rpl16	ω	0.0746269	0.0767263	0	0.114943	0	0	0.114943	0	0
	rpl20		dn	0.0073	0	0.0073	0	0.0073	0	0	0.0073	0	0
			ds	0	0.0135	0.0135	0.0135	0.0135	0	0.0135	0.0135	0	0
		rpl20	ω		0	0.540741	0	0.540741		0	0.540741
	rpl22		dn	0.0275	0.0665	0.0875	0.0442	0.0585	0.0358	0.05	0.0645	0.0302	0.0053
			ds	0	0.0286	0.0288	0.0485	0.0488	0.0606	0.0605	0.0609	0.0479	0.0121
		rpl22	ω		2.32517	3.03819	0.91134	1.19877	0.590759	0.826446	1.05911	0.63048	0.438017
	rpl23		dn	0	0.0046	0.0046	0	0	0.0046	0	0	0.0046	0
			ds	0	0	0	0	0	0	0	0	0	0
		rpl23	ω
	rpl32		dn	0	0.0376	0.0373	0.0276	0.0275	0.0274	0.0273	0.0273	0.0273	0
			ds	0	0	0	0	0	0	0	0	0	0
		rpl32	ω
	rpl36		dn	0.0121	0.0121	0	0.0121	0	0	0.0121	0	0	0
			ds	0	0	0	0	0	0	0	0	0	0
		rpl36	ω
rpoA	rpoA		dn	0.0053	0.008	0.0026	0.0093	0.004	0.004	0.008	0.0026	0.0027	0.0013
			ds	0.0045	0	0.0045	0.0045	0.009	0.0045	0.0045	0.009	0.0045	0
		rpoA	ω	1.17778		0.577778	2.06667	0.444444	0.888889	1.77778	0.288889	0.6
	rpoB		dn	0.0033	0.0008	0.0032	0.0004	0.0028	0.0004	0.0008	0.0032	0.0008	0.0004
			ds	0.0095	0.007	0.0085	0.0086	0.01	0.0043	0.0072	0.0086	0.0029	0.0043
		rpoB	ω	0.347368	0.114286	0.376471	0.0465116	0.28	0.0930233	0.111111	0.372093	0.275862	0.0930233
	rpoC1		dn	0.0025	0.0013	0.0013	0.0013	0.0013	0	0.0012	0.0012	0	0
			ds	0.0089	0.0045	0.0091	0.0023	0.0069	0.0023	0.0023	0.0071	0.0024	0
		rpoC1	ω	0.280899	0.288889	0.142857	0.565217	0.188406	0	0.521739	0.169014	0
	rpoC2		dn	0.0025	0.0025	0.0019	0.0041	0.0035	0.0028	0.0038	0.0031	0.0025	0.0009
			ds	0.0074	0.0118	0.0129	0.0075	0.0107	0.0043	0.0085	0.0118	0.0053	0.0011
		rpoC2	ω	0.337838	0.211864	0.147287	0.546667	0.327103	0.651163	0.447059	0.262712	0.471698	0.818182
rps	rps2		dn	0.0037	0.0128	0.0128	0.0092	0.0092	0.011	0.0092	0.0092	0.011	0
			ds	0.0067	0	0.0067	0	0.0067	0	0	0.0067	0	0
		rps2	ω	0.552239		1.91045		1.37313			1.37313
	rps3		dn	0.0055	0.0074	0.0055	0.0055	0.0037	0.0018	0.0055	0.0037	0.0018	0
			ds	0.0363	0.0275	0.0273	0.0277	0.0274	0	0.0278	0.0275	0	0
		rps3	ω	0.151515	0.269091	0.201465	0.198556	0.135036		0.197842	0.134545
	rps4		dn	0	0.0042	0.0042	0	0	0.0041	0	0	0.0041	0
			ds	0.0079	0	0.0083	0.0083	0.0169	0.0084	0	0.0085	0	0.0085
		rps4	ω	0		0.506024	0	0	0.488095		0		0
	rps7		dn	0	0	0	0	0	0	0	0	0	0
			ds	0	0	0	0	0	0	0	0	0	0
		rps7	ω
	rps8		dn	0	0.0066	0.0066	0.0099	0.0099	0.0033	0.0099	0.0099	0.0033	0
			ds	0	0	0	0	0	0	0	0	0	0
		rps8	ω
	rps11		dn	0.0032	0.0225	0.0258	0.0064	0.0096	0.0225	0.0064	0.0096	0.0225	0
			ds	0.0103	0	0.0104	0	0.0103	0	0	0.0103	0	0
		rps11	ω	0.31068		2.48077		0.932039			0.932039
	rps12		dn	0	0	0	0.0037	0.0037	0.0037	0.0037	0.0037	0.0037	0
			ds	0.01	0	0.01	0	0.01	0	0	0.01	0	0
		rps12	ω	0		0		0.37			0.37
	rps14		dn	0	0	0	0.0045	0.0045	0.0045	0.0045	0.0045	0.0045	0
			ds	0	0	0	0.0134	0.0134	0.0134	0	0	0	0.0134
		rps14	ω				0.335821	0.335821	0.335821				0
	rps15		dn	0.005	0	0.005	0	0.005	0	0	0.005	0	0
			ds	0	0	0	0	0	0	0	0	0	0
		rps15	ω
	rps16		dn	0.0142	0.0142	0.0189	0.0141	0.0188	0	0.0141	0.0188	0	0
			ds	0.02	0.0204	0	0.0206	0	0	0.0207	0	0	0
		rps16	ω	0.71	0.696078		0.684466			0.681159
	rps18		dn	0	0.0086	0.0086	0.0043	0.0043	0.0043	0.0043	0.0043	0.0043	0
			ds	0.0145	0	0.0145	0	0.0145	0	0	0.0145	0	0
		rps18	ω	0		0.593103		0.296552			0.296552
	rps19		dn	0	0	0	0	0	0	0	0	0	0
			ds	0.0183	0	0.0183	0	0.0183	0	0	0.0183	0	0
		rps19	ω	0		0		0			0
	ycf1		dn	0.0099	0.0099	0.0123	0.0119	0.0142	0.0061	0.01	0.0123	0.0042	0.0019
			ds	0.0081	0.0111	0.0148	0.0096	0.0137	0.0081	0.0076	0.0117	0.0061	0.002
		ycf1	ω	1.22222	0.891892	0.831081	1.23958	1.0365	0.753086	1.31579	1.05128	0.688525	0.95
	ycf2		dn	0.0006	0.0002	0.0008	0.0002	0.0008	0.0004	0.0004	0.0009	0.0006	0.0002
			ds	0.0012	0.0013	0.0026	0.0013	0.0026	0	0.002	0.0033	0.0007	0.0007
		ycf2	ω	0.5	0.153846	0.307692	0.153846	0.307692		0.2	0.272727	0.857143	0.285714
	ycf3		dn	0.0026	0	0.0026	0	0.0026	0	0	0.0026	0	0
			ds	0.0164	0.0165	0.0165	0.0165	0.0165	0	0.0165	0.0165	0	0
		ycf3	ω	0.158537	0	0.157576	0	0.157576		0	0.157576
	ycf4		dn	0	0.0024	0.0024	0	0	0.0024	0	0	0.0024	0
			ds	0	0.0072	0.0072	0	0	0.0072	0	0	0.0072	0
		ycf4	ω		0.333333	0.333333			0.333333			0.333333
