# Supplementary material for: Interspecific variation and phylogenetic relationship between mangrove and non-mangrove species of a same family (Meliaceae)—insights from comparative analysis of complete chloroplast genome
Source: PeerJ. 2023 Jun 26;11:e15527. doi: 10.7717/peerj.15527 (PMC10309054; doi:10.7717/peerj.15527)
Supplement: Supplemental Information 9 [file peerj-11-15527-s009.xlsx]

## Sheet: Sheet1
Table S9 Codon usage in all protein coding genes of five Meliaceae species
X. granatum						X. moluccensis						X. rumphii						C. guianensis						S. macrophylla
Amino acid	codon	Number	RSCU	Proportion		Amino acid	codon	Number	RSCU	Proportion		Amino acid	codon	Number	RSCU	Proportion		Amino acid	codon	Number	RSCU	Proportion		Amino acid	codon	Number	RSCU	Proportion
Phe	UUU	825	1.33	0.0573574		Phe	UUU	822	1.32	0.0574458		Phe	UUU	821	1.32	0.0573774		Phe	UUU	802	1.31	0.0569268		Phe	UUU	809	1.31	0.0571429
	UUC	420	0.67				UUC	424	0.68				UUC	423	0.68				UUC	425	0.69				UUC	425	0.69
Leu	UUA	721	1.89	0.105317		Leu	UUA	719	1.89	0.10521		Leu	UUA	722	1.9	0.105392		Leu	UUA	715	1.88	0.105734		Leu	UUA	718	1.89	0.105719
	UUG	466	1.22				UUG	464	1.22				UUG	464	1.22				UUG	466	1.23				UUG	465	1.22
	CUU	484	1.27				CUU	483	1.27				CUU	483	1.27				CUU	480	1.26				CUU	479	1.26
	CUC	143	0.38				CUC	142	0.37				CUC	143	0.38				CUC	145	0.38				CUC	145	0.38
	CUA	313	0.82				CUA	313	0.82				CUA	312	0.82				CUA	314	0.83				CUA	313	0.82
	CUG	159	0.42				CUG	161	0.42				CUG	161	0.42				CUG	159	0.42				CUG	163	0.43
Ile	AUU	913	1.47	0.0855985		Ile	AUU	908	1.46	0.0857538		Ile	AUU	908	1.47	0.0856972		Ile	AUU	902	1.47	0.0855526		Ile	AUU	904	1.47	0.0855291
	AUC	384	0.62				AUC	389	0.63				AUC	388	0.63				AUC	387	0.63				AUC	387	0.63
	AUA	561	0.91				AUA	563	0.91				AUA	562	0.91				AUA	555	0.9				AUA	556	0.9
Met	AUG	497	1	0.0228969		Met	AUG	496	1	0.0228677		Met	AUG	497	1	0.0229233		Met	AUG	495	1	0.0229656		Met	AUG	500	1	0.0231535
Val	GUU	440	1.46	0.0555607		Val	GUU	444	1.47	0.0556017		Val	GUU	442	1.47	0.0556247		Val	GUU	441	1.47	0.0558133		Val	GUU	446	1.48	0.0557073
	GUC	147	0.49				GUC	144	0.48				GUC	146	0.48				GUC	146	0.49				GUC	142	0.47
	GUA	458	1.52				GUA	458	1.52				GUA	459	1.52				GUA	457	1.52				GUA	454	1.51
	GUG	161	0.53				GUG	160	0.53				GUG	159	0.53				GUG	159	0.53				GUG	161	0.54
Ser	UCU	432	1.61	0.0739888		Ser	UCU	437	1.63	0.0740433		Ser	UCU	431	1.62	0.0737051		Ser	UCU	429	1.62	0.0739074		Ser	UCU	426	1.61	0.0736745
	UCC	265	0.99				UCC	263	0.98				UCC	264	0.99				UCC	262	0.99				UCC	270	1.02
	UCA	311	1.16				UCA	310	1.16				UCA	308	1.16				UCA	308	1.16				UCA	307	1.16
	UCG	164	0.61				UCG	163	0.61				UCG	164	0.62				UCG	163	0.61				UCG	160	0.6
	AGU	332	1.24				AGU	331	1.24				AGU	332	1.25				AGU	331	1.25				AGU	328	1.24
	AGC	102	0.38				AGC	102	0.38				AGC	99	0.37				AGC	100	0.38				AGC	100	0.38
Pro	CCU	349	1.54	0.0416935		Pro	CCU	348	1.54	0.0416321		Pro	CCU	348	1.55	0.0414188		Pro	CCU	350	1.55	0.0418948		Pro	CCU	354	1.56	0.0419078
	CCC	185	0.82				CCC	185	0.82				CCC	183	0.82				CCC	186	0.82				CCC	184	0.81
	CCA	246	1.09				CCA	248	1.1				CCA	245	1.09				CCA	247	1.09				CCA	245	1.08
	CCG	125	0.55				CCG	122	0.54				CCG	122	0.54				CCG	120	0.53				CCG	122	0.54
Thr	ACU	426	1.56	0.0504008		Thr	ACU	428	1.56	0.050438		Thr	ACU	426	1.55	0.0505973		Thr	ACU	422	1.55	0.0505243		Thr	ACU	424	1.56	0.0504746
	ACC	211	0.77				ACC	210	0.77				ACC	211	0.77				ACC	210	0.77				ACC	207	0.76
	ACA	333	1.22				ACA	329	1.2				ACA	331	1.21				ACA	330	1.21				ACA	330	1.21
	ACG	124	0.45				ACG	127	0.46				ACG	129	0.47				ACG	127	0.47				ACG	129	0.47
Ala	GCU	535	1.77	0.0556067		Ala	GCU	533	1.77	0.0556017		Ala	GCU	534	1.77	0.0556247		Ala	GCU	541	1.79	0.0561381		Ala	GCU	540	1.77	0.0563556
	GCC	193	0.64				GCC	191	0.63				GCC	191	0.63				GCC	190	0.63				GCC	192	0.63
	GCA	340	1.13				GCA	343	1.14				GCA	342	1.13				GCA	337	1.11				GCA	340	1.12
	GCG	139	0.46				GCG	139	0.46				GCG	139	0.46				GCG	142	0.47				GCG	145	0.48
Tyr	UAU	656	1.64	0.036764		Tyr	UAU	660	1.64	0.0370678		Tyr	UAU	657	1.64	0.0369909		Tyr	UAU	653	1.64	0.0368841		Tyr	UAU	643	1.64	0.036351
	UAC	142	0.36				UAC	144	0.36				UAC	145	0.36				UAC	142	0.36				UAC	142	0.36
His	CAU	393	1.46	0.0247397		His	CAU	390	1.46	0.0245735		His	CAU	390	1.47	0.0245376		His	CAU	386	1.46	0.0245894		His	CAU	392	1.46	0.0248206
	CAC	144	0.54				CAC	143	0.54				CAC	142	0.53				CAC	144	0.54				CAC	144	0.54
Gln	CAA	583	1.52	0.0353819		Gln	CAA	579	1.52	0.0352236		Gln	CAA	579	1.52	0.0352382		Gln	CAA	575	1.52	0.0351675		Gln	CAA	578	1.52	0.0352859
	CAG	185	0.48				CAG	185	0.48				CAG	185	0.48				CAG	183	0.48				CAG	184	0.48
Asn	AAU	800	1.53	0.0480973		Asn	AAU	805	1.53	0.0483633		Asn	AAU	801	1.53	0.048245		Asn	AAU	797	1.54	0.0479725		Asn	AAU	794	1.54	0.0476036
	AAC	244	0.47				AAC	244	0.47				AAC	245	0.47				AAC	237	0.46				AAC	234	0.46
Lys	AAA	874	1.5	0.0536257		Lys	AAA	873	1.51	0.0533887		Lys	AAA	870	1.51	0.0532725		Lys	AAA	843	1.5	0.0522873		Lys	AAA	840	1.49	0.0520491
	AAG	290	0.5				AAG	285	0.49				AAG	285	0.49				AAG	284	0.5				AAG	284	0.51
Asp	GAU	699	1.59	0.0405418		Asp	GAU	693	1.59	0.0402029		Asp	GAU	695	1.59	0.040404		Asp	GAU	686	1.58	0.0403173		Asp	GAU	698	1.58	0.0407965
	GAC	181	0.41				GAC	179	0.41				GAC	181	0.41				GAC	183	0.42				GAC	183	0.42
Glu	GAA	871	1.51	0.053119		Glu	GAA	880	1.51	0.0535731		Glu	GAA	880	1.51	0.0535953		Glu	GAA	874	1.51	0.0537719		Glu	GAA	881	1.52	0.0537624
	GAG	282	0.49				GAG	282	0.49				GAG	282	0.49				GAG	285	0.49				GAG	280	0.48
Cys	UGU	173	1.45	0.0110108		Cys	UGU	173	1.44	0.011065		Cys	UGU	175	1.46	0.0110696		Cys	UGU	174	1.44	0.0111812		Cys	UGU	173	1.43	0.0112063
	UGC	66	0.55				UGC	67	0.56				UGC	65	0.54				UGC	67	0.56				UGC	69	0.57
Trp	UGG	405	1	0.0186584		Trp	UGG	400	1	0.0184417		Trp	UGG	399	1	0.0184032		Trp	UGG	387	1	0.0179549		Trp	UGG	388	1	0.0179671
Arg	CGU	269	1.25	0.059707		Arg	CGU	269	1.25	0.0595205		Arg	CGU	269	1.24	0.0598681		Arg	CGU	269	1.25	0.0601281		Arg	CGU	271	1.25	0.0600602
	CGC	96	0.44				CGC	96	0.45				CGC	95	0.44				CGC	99	0.46				CGC	98	0.45
	CGA	301	1.39				CGA	296	1.38				CGA	298	1.38				CGA	302	1.4				CGA	302	1.4
	CGG	101	0.47				CGG	105	0.49				CGG	104	0.48				CGG	105	0.49				CGG	102	0.47
	AGA	391	1.81				AGA	391	1.82				AGA	396	1.83				AGA	384	1.78				AGA	389	1.8
	AGG	138	0.64				AGG	134	0.62				AGG	136	0.63				AGG	137	0.63				AGG	135	0.62
Gly	GGU	508	1.34	0.0699346		Gly	GGU	507	1.34	0.0590134		Gly	GGU	508	1.34	0.0700152		Gly	GGU	505	1.33	0.0702886		Gly	GGU	502	1.32	0.070433
	GGC	142	0.37				GGC	144	0.38				GGC	143	0.38				GGC	147	0.39				GGC	149	0.39
	GGA	604	1.59				GGA	603	1.59				GGA	604	1.59				GGA	601	1.59				GGA	600	1.58
	GGG	264	0.7				GGG	26	0.7				GGG	263	0.69				GGG	262	0.69				GGG	270	0.71
