# Supplementary material for: Interspecific variation and phylogenetic relationship between mangrove and non-mangrove species of a same family (Meliaceae)—insights from comparative analysis of complete chloroplast genome
Source: PeerJ. 2023 Jun 26;11:e15527. doi: 10.7717/peerj.15527 (PMC10309054; doi:10.7717/peerj.15527)
Supplement: Supplemental Information 10 [file peerj-11-15527-s010.xlsx]

## Sheet: Sheet1
Table S10 Putative RNA editing sites
X. granatum							X. moluccensis							X. rumphii							C. guianensis							S. macrophylla
	Nt Pos	AA Pos	Align Col	Effect	Score			Nt Pos	AA Pos	Align Col	Effect	Score			Nt Pos	AA Pos	Align Col	Effect	Score			Nt Pos	AA Pos	Align Col	Effect	Score			Nt Pos	AA Pos	Align Col	Effect	Score
accD	803	268	290	TCG (S) => TTG (L)	0.8		accD	875	292	306	TCG (S) => TTG (L)	0.8		accD	935	312	326	TCG (S) => TTG (L)	0.8		accD	797	266	288	TCG (S) => TTG (L)	0.8		accD	803	268	290	TCG (S) => TTG (L)	0.8
atpA	791	264	264	CCC (P) => CTC (L)	1		atpA	791	264	264	CCC (P) => CTC (L)	1		atpA	791	264	264	CCC (P) => CTC (L)	1		atpA	791	264	264	CCC (P) => CTC (L)	1		atpA	791	264	264	CCC (P) => CTC (L)	1
atpB	403	135	135	CCA (P) => TCA (S)	0.86		atpB	403	135	135	CCA (P) => TCA (S)	0.86		atpB	403	135	135	CCA (P) => TCA (S)	0.86		atpB	286	96	135	CCA (P) => TCA (S)	0.86		atpB	403	135	135	CCA (P) => TCA (S)	0.86
atpF	92	31	31	CCA (P) => CTA (L)	0.86		atpF	92	31	31	CCA (P) => CTA (L)	0.86		atpF	92	31	31	CCA (P) => CTA (L)	0.86		atpF	92	31	31	CCA (P) => CTA (L)	0.86		atpF	92	31	31	CCA (P) => CTA (L)	0.86
ccsA							ccsA							ccsA							ccsA							ccsA	92	31	31	GCC (A) => GTC (V)	1
clpP	556	186	187	CAT (H) => TAT (Y)	1		clpP	559	187	187	CAT (H) => TAT (Y)	1		clpP	559	187	187	CAT (H) => TAT (Y)	1		clpP	556	186	187	CAT (H) => TAT (Y)	1		clpP	556	186	187	CAT (H) => TAT (Y)	1
matK	457	153	165	CAC (H) => TAC (Y)	1		matK	457	153	165	CAC (H) => TAC (Y)	1		matK	457	153	165	CAC (H) => TAC (Y)	1		matK	457	153	165	CAC (H) => TAC (Y)	1		matK	457	153	165	CAC (H) => TAC (Y)	1
	550	184	196	CAT (H) => TAT (Y)	0.86			550	184	196	CAT (H) => TAT (Y)	0.86			550	184	196	CAT (H) => TAT (Y)	0.86			550	184	196	CAT (H) => TAT (Y)	0.86			550	184	196	CAT (H) => TAT (Y)	0.86
	643	215	227	CAT (H) => TAT (Y)	1			643	215	227	CAT (H) => TAT (Y)	1			643	215	227	CAT (H) => TAT (Y)	1			643	215	227	CAT (H) => TAT (Y)	1			643	215	227	CAT (H) => TAT (Y)	1
ndhA	107	36	36	CCT (P) => CTT (L)	1		ndhA	107	36	36	CCT (P) => CTT (L)	1		ndhA	107	36	36	CCT (P) => CTT (L)	1		ndhA	107	36	36	CCT (P) => CTT (L)	1		ndhA	107	36	36	CCT (P) => CTT (L)	1
	341	114	114	TCA (S) => TTA (L)	1			341	114	114	TCA (S) => TTA (L)	1			341	114	114	TCA (S) => TTA (L)	1			341	114	114	TCA (S) => TTA (L)	1			341	114	114	TCA (S) => TTA (L)	1
	566	189	189	TCA (S) => TTA (L)	1			566	189	189	TCA (S) => TTA (L)	1			566	189	189	TCA (S) => TTA (L)	1			566	189	189	TCA (S) => TTA (L)	1			566	189	189	TCA (S) => TTA (L)	1
	1073	358	358	TCC (S) => TTC (F)	1			1073	358	358	TCC (S) => TTC (F)	1			1073	358	358	TCC (S) => TTC (F)	1			1073	358	358	TCC (S) => TTC (F)	1			1073	358	358	TCC (S) => TTC (F)	1
ndhB	149	50	50	TCA (S) => TTA (L)	1		ndhB	149	50	50	TCA (S) => TTA (L)	1		ndhB	149	50	50	TCA (S) => TTA (L)	1		ndhB	149	50	50	TCA (S) => TTA (L)	1		ndhB	149	50	50	TCA (S) => TTA (L)	1
	467	156	156	CCA (P) => CTA (L)	1			467	156	156	CCA (P) => CTA (L)	1			467	156	156	CCA (P) => CTA (L)	1			467	156	156	CCA (P) => CTA (L)	1			467	156	156	CCA (P) => CTA (L)	1
	586	196	196	CAT (H) => TAT (Y)	1			586	196	196	CAT (H) => TAT (Y)	1			586	196	196	CAT (H) => TAT (Y)	1			586	196	196	CAT (H) => TAT (Y)	1			586	196	196	CAT (H) => TAT (Y)	1
	611	204	204	TCA (S) => TTA (L)	0.8			611	204	204	TCA (S) => TTA (L)	0.8			611	204	204	TCA (S) => TTA (L)	0.8			611	204	204	TCA (S) => TTA (L)	0.8			611	204	204	TCA (S) => TTA (L)	0.8
	737	246	246	CCA (P) => CTA (L)	1			737	246	246	CCA (P) => CTA (L)	1			737	246	246	CCA (P) => CTA (L)	1			737	246	246	CCA (P) => CTA (L)	1			737	246	246	CCA (P) => CTA (L)	1
	746	249	249	TCT (S) => TTT (F)	1			746	249	249	TCT (S) => TTT (F)	1			746	249	249	TCT (S) => TTT (F)	1			746	249	249	TCT (S) => TTT (F)	1			746	249	249	TCT (S) => TTT (F)	1
	830	277	277	TCA (S) => TTA (L)	1			830	277	277	TCA (S) => TTA (L)	1			830	277	277	TCA (S) => TTA (L)	1			830	277	277	TCA (S) => TTA (L)	1			830	277	277	TCA (S) => TTA (L)	1
	836	279	279	TCA (S) => TTA (L)	1			836	279	279	TCA (S) => TTA (L)	1			836	279	279	TCA (S) => TTA (L)	1			836	279	279	TCA (S) => TTA (L)	1			836	279	279	TCA (S) => TTA (L)	1
	1255	419	419	CAT (H) => TAT (Y)	1			1255	419	419	CAT (H) => TAT (Y)	1			1255	419	419	CAT (H) => TAT (Y)	1			1255	419	419	CAT (H) => TAT (Y)	1			1255	419	419	CAT (H) => TAT (Y)	1
	1481	494	494	CCA (P) => CTA (L)	1			1481	494	494	CCA (P) => CTA (L)	1			1481	494	494	CCA (P) => CTA (L)	1			1481	494	494	CCA (P) => CTA (L)	1			1481	494	494	CCA (P) => CTA (L)	1
ndhD	29	10	10	ACG (T) => ATG (M)	1		ndhD	29	10	10	ACG (T) => ATG (M)	1		ndhD	29	10	10	ACG (T) => ATG (M)	1		ndhD	2	1	1	ACG (T) => ATG (M)	1		ndhD	2	1	1	ACG (T) => ATG (M)	1
	340	114	114	CGG (R) => TGG (W)	0.8			340	114	114	CGG (R) => TGG (W)	0.8			340	114	114	CGG (R) => TGG (W)	0.8			313	105	105	CGG (R) => TGG (W)	0.8			313	105	105	CGG (R) => TGG (W)	0.8
	410	137	137	CCA (P) => CTA (L)	1			410	137	137	CCA (P) => CTA (L)	1			410	137	137	CCA (P) => CTA (L)	1			383	128	128	CCA (P) => CTA (L)	1			383	128	128	CCA (P) => CTA (L)	1
	701	234	234	TCA (S) => TTA (L)	1			701	234	234	TCA (S) => TTA (L)	1			701	234	234	TCA (S) => TTA (L)	1			674	225	225	TCA (S) => TTA (L)	1			674	225	225	TCA (S) => TTA (L)	1
	905	302	302	TCA (S) => TTA (L)	1			905	302	302	TCA (S) => TTA (L)	1			905	302	302	TCA (S) => TTA (L)	1			878	293	293	TCA (S) => TTA (L)	1			878	293	293	TCA (S) => TTA (L)	1
	914	305	305	CCT (P) => CTT (L)	1			914	305	305	CCT (P) => CTT (L)	1			914	305	305	CCT (P) => CTT (L)	1			887	296	296	CCT (P) => CTT (L)	1			887	296	296	CCT (P) => CTT (L)	1
	1103	368	368	GCT (A) => GTT (V)	1			1103	368	368	GCT (A) => GTT (V)	1			1103	368	368	GCT (A) => GTT (V)	1			1076	359	359	GCT (A) => GTT (V)	1			1076	359	359	GCT (A) => GTT (V)	1
	1325	442	442	TCA (S) => TTA (L)	0.8			1325	442	442	TCA (S) => TTA (L)	0.8			1325	442	442	TCA (S) => TTA (L)	0.8			1298	433	433	TCA (S) => TTA (L)	0.8			1298	433	433	TCA (S) => TTA (L)	0.8
	1337	446	446	TCA (S) => TTA (L)	0.8			1337	446	446	TCA (S) => TTA (L)	0.8			1337	446	446	TCA (S) => TTA (L)	0.8			1310	437	437	TCA (S) => TTA (L)	0.8			1310	437	437	TCA (S) => TTA (L)	0.8
	1432	478	478	CTT (L) => TTT (F)	0.8			1432	478	478	CTT (L) => TTT (F)	0.8			1432	478	478	CTT (L) => TTT (F)	0.8			1405	469	469	CTT (L) => TTT (F)	0.8			1405	469	469	CTT (L) => TTT (F)	0.8
ndhF	1040	347	347	ACT (T) => ATT (I)	1		ndhF	1040	347	347	ACT (T) => ATT (I)	1		ndhF	1040	347	347	ACT (T) => ATT (I)	1		ndhF	1040	347	347	ACT (T) => ATT (I)	1		ndhF	1040	347	347	ACT (T) => ATT (I)	1
	1840	614	622	CTC (L) => TTC (F)	1			1840	614	622	CTC (L) => TTC (F)	1			1840	614	622	CTC (L) => TTC (F)	1			1919	640	648	GCT (A) => GTT (V)	0.8			1919	640	648	GCT (A) => GTT (V)	0.8
	1919	640	648	GCT (A) => GTT (V)	0.8			1919	640	648	GCT (A) => GTT (V)	0.8			1919	640	648	GCT (A) => GTT (V)	0.8										2215	739	750	CTT (L) => TTT (F)	1
ndhG	166	56	56	CAT (H) => TAT (Y)	0.8		ndhG	166	56	56	CAT (H) => TAT (Y)	0.8		ndhG	166	56	56	CAT (H) => TAT (Y)	0.8		ndhG	166	56	56	CAT (H) => TAT (Y)	0.8		ndhG	166	56	56	CAT (H) => TAT (Y)	0.8
	320	107	107	ACA (T) => ATA (I)	0.8			320	107	107	ACA (T) => ATA (I)	0.8			320	107	107	ACA (T) => ATA (I)	0.8			320	107	107	ACA (T) => ATA (I)	0.8			320	107	107	ACA (T) => ATA (I)	0.8
psbF	77	26	26	TCT (S) => TTT (F)	1		psbF	77	26	26	TCT (S) => TTT (F)	1		psbF	77	26	26	TCT (S) => TTT (F)	1		psbF	77	26	26	TCT (S) => TTT (F)	1		psbF	77	26	26	TCT (S) => TTT (F)	1
rpl20	308	103	103	TCA (S) => TTA (L)	0.86		rpl20	308	103	103	TCA (S) => TTA (L)	0.86		rpl20	308	103	103	TCA (S) => TTA (L)	0.86		rpl20	308	103	103	TCA (S) => TTA (L)	0.86		rpl20	308	103	103	TCA (S) => TTA (L)	0.86
rpoA	830	277	279	TCA (S) => TTA (L)	1		rpoA	830	277	279	TCA (S) => TTA (L)	1		rpoA	830	277	279	TCA (S) => TTA (L)	1		rpoA	830	277	279	TCA (S) => TTA (L)	1		rpoA	830	277	279	TCA (S) => TTA (L)	1
rpoB	338	113	113	TCT (S) => TTT (F)	1		rpoB	338	113	113	TCT (S) => TTT (F)	1		rpoB	338	113	113	TCT (S) => TTT (F)	1		rpoB	338	113	113	TCT (S) => TTT (F)	1		rpoB	338	113	113	TCT (S) => TTT (F)	1
	551	184	185	TCA (S) => TTA (L)	1			551	184	185	TCA (S) => TTA (L)	1			551	184	185	TCA (S) => TTA (L)	1			551	184	185	TCA (S) => TTA (L)	1			551	184	185	TCA (S) => TTA (L)	1
	566	189	190	TCG (S) => TTG (L)	1			566	189	190	TCG (S) => TTG (L)	1			566	189	190	TCG (S) => TTG (L)	1			566	189	190	TCG (S) => TTG (L)	1			566	189	190	TCG (S) => TTG (L)	1
	1934	645	662	GCT (A) => GTT (V)	0.86			1934	645	662	GCT (A) => GTT (V)	0.86			1934	645	662	GCT (A) => GTT (V)	0.86			1934	645	662	GCT (A) => GTT (V)	0.86			1934	645	662	GCT (A) => GTT (V)	0.86
	2426	809	827	TCA (S) => TTA (L)	0.86			2426	809	827	TCA (S) => TTA (L)	0.86			2426	809	827	TCA (S) => TTA (L)	0.86			2426	809	827	TCA (S) => TTA (L)	0.86			2426	809	827	TCA (S) => TTA (L)	0.86
rpoC1	62	21	21	TCA (S) => TTA (L)	1		rpoC1	62	21	21	TCA (S) => TTA (L)	1		rpoC1	41	14	14	TCA (S) => TTA (L)	1		rpoC1	62	21	21	TCA (S) => TTA (L)	1		rpoC1	41	14	14	TCA (S) => TTA (L)	1
rpoC2	1687	563	584	CAT (H) => TAT (Y)	0.86		rpoC2	1687	563	584	CAT (H) => TAT (Y)	0.86		rpoC2	1687	563	584	CAT (H) => TAT (Y)	0.86		rpoC2	1687	563	584	CAT (H) => TAT (Y)	0.86		rpoC2	1687	563	584	CAT (H) => TAT (Y)	0.86
	2036	679	862	ACT (T) => ATT (I)	1			2036	679	862	ACT (T) => ATT (I)	1			2036	679	862	ACT (T) => ATT (I)	1			2036	679	862	ACT (T) => ATT (I)	1			2036	679	862	ACT (T) => ATT (I)	1
	2320	774	959	CGG (R) => TGG (W)	1			2320	774	959	CGG (R) => TGG (W)	1			2320	774	959	CGG (R) => TGG (W)	1			2320	774	959	CGG (R) => TGG (W)	1			2320	774	959	CGG (R) => TGG (W)	1
	3241	1081	1288	CTT (L) => TTT (F)	0.86			3241	1081	1288	CTT (L) => TTT (F)	0.86			3241	1081	1288	CTT (L) => TTT (F)	0.86			3241	1081	1288	CTT (L) => TTT (F)	0.86			3241	1081	1288	CTT (L) => TTT (F)	0.86
	4171	1391	1607	CTT (L) => TTT (F)	0.8			4171	1391	1607	CTT (L) => TTT (F)	0.8			4171	1391	1607	CTT (L) => TTT (F)	0.8										4171	1391	1607	CTT (L) => TTT (F)	0.8
rps14	80	27	27	TCA (S) => TTA (L)	1		rps14	80	27	27	TCA (S) => TTA (L)	1		rps14	80	27	27	TCA (S) => TTA (L)	1		rps14	80	27	27	TCA (S) => TTA (L)	1		rps14	80	27	27	TCA (S) => TTA (L)	1
	149	50	53	TCA (S) => TTA (L)	1			149	50	53	TCA (S) => TTA (L)	1			149	50	53	TCA (S) => TTA (L)	1			149	50	53	TCA (S) => TTA (L)	1			149	50	53	TCA (S) => TTA (L)	1
rps16	212	71	71	TCA (S) => TTA (L)	0.83		rps16	212	71	71	TCA (S) => TTA (L)	0.83		rps16	212	71	71	TCA (S) => TTA (L)	0.83		rps16	212	71	71	TCA (S) => TTA (L)	0.83		rps16	212	71	71	TCA (S) => TTA (L)	0.83
rps2	248	83	83	TCA (S) => TTA (L)	1		rps2	248	83	83	TCA (S) => TTA (L)	1		rps2	248	83	83	TCA (S) => TTA (L)	1		rps2	248	83	83	TCA (S) => TTA (L)	1		rps2	248	83	83	TCA (S) => TTA (L)	1
